40 **ABSTRACT**

41 **Background:** Certain combinations of medications can be harmful and may lead to serious drug-  
42 drug interactions. Identifying potentially problematic medication clusters could help guide  
43 prescribing decisions in hospital.

44  
45 **Objectives:** To characterize medication prescribing patterns at hospital discharge and determine  
46 which medication clusters are associated with an increased risk of adverse drug events (ADEs) in  
47 the 30-days post hospital discharge.

48  
49 **Methods:** All residents of the province of Ontario in Canada aged 66 years or older admitted to  
50 hospital between March 2016-February 2017 were included. Identification of medication  
51 prescribing clusters at hospital discharge was conducted using latent class analysis. Cluster  
52 identification was based on medications dispensed 30-days post-hospitalization. Multivariable  
53 logistic regression was used to assess the potential association between membership to a particular  
54 medication cluster and ADEs post-discharge, while also evaluating other patient characteristics.

55  
56 **Results:** 188,354 patients were included in the study cohort. Median age (IQR) was 77 (71-84)  
57 and patients had a median (IQR) of 9 (6-13) medications dispensed in the year prior to admission.  
58 The study population consisted of 6 separate clusters of dispensing patterns post discharge:  
59 Cardiovascular (14%), respiratory (26%), complex care needs (12%), cardiovascular and  
60 metabolic (15%), infection (10%) and surgical (24%). Overall, 12,680 (7%) patients had an ADE  
61 in the 30-days following discharge. After considering other patient characteristics, those in the  
62 respiratory cluster had the highest risk of ADEs (aOR: 1.12, 95% CI: 1.08-1.17) compared to all  
63 the other clusters, while those in the neurocognitive & complex care needs cluster had the lowest  
64 risk (aOR:0.82, 95% CI: 0.77-0.87).

65  
66 **Conclusion:** This study suggests that ADEs post hospital discharge are linked to identifiable  
67 clusters of medications, in addition to non-modifiable patient characteristics, such as age and  
68 certain comorbidities. This information may help clinicians and researchers better understand what  
69 patient populations and which types of interventions may benefit patients, to reduce their risk of  
70 experiencing an ADE.

71

72

73

74

75

76

77 **KEY POINTS**

78

79 This study suggests that ADEs post hospital discharge are linked to identifiable clusters of  
80 medications, in addition to non-modifiable patient characteristics, such as age and certain  
81 comorbidities. This information may help clinicians and researchers better understand what patient  
82 populations and which types of interventions may benefit patients, to reduce their risk of  
83 experiencing an ADE.

84

85 **PLAIN LANGUAGE SUMMARY**

86

87 Certain combinations of medications prescribed to patients when they are being discharged from  
88 hospital can increase the risk of adverse events after hospital discharge.

89

90

91

92

93

94

95

96

97

98

99

100

101

102

103

104

105

106

107

108

109

110

111

112

113

114

115

116

117 **INTRODUCTION**

118  
119 Adverse drug events (ADEs) are common following an acute hospitalization, especially among  
120 older adults using multiple medications.<sup>1</sup> Post-discharge ADEs arise from multiple factors  
121 including inappropriate or low value prescribing, medication changes by the in-hospital care team,  
122 side effects related to new medications, and inadequate monitoring of high risk medications (e.g.,  
123 anti-coagulants, antihyperglycemics, or combinations thereof etc.).<sup>2-4</sup> Medication changes occur  
124 often for older adults during hospitalization.<sup>5-7</sup> For example, a recent study by our team found that  
125 medical and surgical patients discharged from hospital were prescribed an average of 8  
126 medications at discharge with 4 medication changes; 61% of changes were newly prescribed  
127 medications, 24% were discontinuations, and 15% were dose changes.<sup>8</sup> A related study  
128 demonstrated that newly prescribed medications were associated with the highest risk of ADEs  
129 following discharge, compared to medications that were continued from prior to admission.<sup>3</sup>

130 Associations between specific medications or medication classes and adverse events  
131 following hospitalization have been evaluated (e.g., newly initiated antihypertensives are  
132 associated with an increased fall risk post-discharge);<sup>1,9,10</sup> however, no study has examined the  
133 association between *clusters* of medications prescribed at discharge from hospital and the risk of  
134 ADEs to our knowledge. A medication cluster refers to groups of medications that a patient is  
135 taking concurrently over a given period of time. For example, the co-occurrence of psychiatric  
136 disorders with diabetes, hypertension, and coronary artery disease within a single patient is  
137 common,<sup>11</sup> however, the combined safety of medications to treat these conditions simultaneously  
138 (e.g., combination of antihyperglycemics, calcium channel blockers, lipid modifying agents and  
139 psychoanaleptics) is not known.<sup>12,13</sup> Indeed, certain combinations of medications can be harmful  
140 and may lead to serious drug-drug and drug-condition interactions (e.g., opioids and

141 gabapentinoids; combination sedatives; anticholinergic burden; combination blood thinners).<sup>14,15</sup>  
142 Identifying potentially problematic clusters could help guide prescribing decisions in hospital  
143 related to re-evaluating newly started therapies as well as potentially deprescribing usual home  
144 medications. This could also help identify patients at high risk of ADEs who would benefit from  
145 targeted pharmacy specialty support prior to discharge.

146       Using administrative health data, the primary objective of this study was to characterize  
147 medication prescribing patterns at hospital discharge and determine which medication clusters  
148 were associated with an increased risk of ADEs in the 30-days post hospital discharge. The  
149 secondary objective was to confirm other previously described patient-level factors associated with  
150 the occurrence of ADEs .

## 151 **METHODS**

### 152 *Study design & setting*

153 We conducted a population based retrospective cohort study from March 1, 2016-February 28,  
154 2017, of residents aged 66 years of age or older living in the province of Ontario, Canada. Ontario  
155 has a diverse, multicultural population of approximately 2 million people aged 65 years of age or  
156 older. All Ontario residents receive universal access to physician and hospital services, and those  
157 aged 65 years and up receive medication coverage through a provincial publicly-funded drug  
158 insurance program. Ethics approval for data access was obtained from the Ontario Ministry of  
159 Health and Trillium Health Partners. Patient consent was not required since the data was fully  
160 anonymized.

161

162

163

164 *Data sources*

165 Multiple linked healthcare administrative databases were utilized for this study. Patient  
166 demographics and healthcare records were linked using encrypted health card numbers which  
167 served as unique and anonymous identifiers across databases. The Ontario Registered Persons  
168 Database contains basic demographic information including death.<sup>16</sup> The Ontario Drug Benefits  
169 database contains prescription medication claims for all residents aged 65 years or older for  
170 medications dispensed to non-hospitalized patients.<sup>17</sup> The Canadian Institutes of Health  
171 Information's Discharge Abstract Database and National Ambulatory Care Reporting System  
172 contains detailed information for all admissions to hospital and emergency department visits. The  
173 Ontario Health Insurance Plan physician claims database contains information on all outpatient  
174 services provided by fee-for-service physicians.

175

176 *Study Population*

177 All Ontario residents aged 66 years or older admitted to hospital between March 1 2016-February  
178 28 2017 were included. If patients were admitted more than once during the study period, only  
179 their first hospital episode was considered. We limited the study population to those aged 66 and  
180 above as medications are covered under the Ontario Drug Benefits (ODB) program for those aged  
181 65 and above in Ontario, and thus outpatient medication dispensing data is available for this  
182 population from 1 year prior to hospitalization. We included only those patients who were  
183 discharged to home or to a long term care facility. Patients who were transferred to or from another  
184 acute care setting were excluded since we would not have a record of their most recent medication  
185 use histories. Additionally, we excluded patients who did not have at least one medication with a  
186 valid Anatomical Therapeutic Chemical (ATC) code dispensed in the 30-days following discharge

187 prior to another healthcare visit. To improve the performance of our clustering algorithm and  
188 identify the most clinically relevant clusters, medication classes with a prevalence of less than 1%  
189 were excluded (see Appendix Table A1 for list of excluded medications) (Figure 1). Study patients  
190 were followed until they were re-hospitalized, visited the emergency department (ED), died from  
191 any cause or the study period ended (30-days following index date), whichever occurred first.

192

### 193 *Medications dispensed post-hospitalization*

194 Medications dispensed following hospital discharge were measured using prescription claims for  
195 medications in the 30-days following hospital discharge. For each dispensed medication,  
196 information about the drug identification number (DIN), Anatomical Therapeutic Chemical (ATC  
197 code), dispensing date, quantity dispensed and days supply was available. Medications dispensed  
198 following a post-discharge healthcare encounter (outpatient visit, ED visit, hospital readmission  
199 following index date) were excluded to ensure dispensed medications would capture prescribing  
200 decisions made during the index hospital stay alone. This approach was intended to capture  
201 medications that were part of the patients' discharge prescription (either newly prescribed or  
202 continued from the community prior to the index admission). New medications were defined as  
203 those which were not dispensed in the year prior to the index admission and were subsequently  
204 dispensed in the 30-days following discharge, while medications continued at hospital discharge  
205 were those that were dispensed in the 1-year prior to admission and also dispensed in the 30-days  
206 following discharge. Medication class was defined using 3-digit ATC codes<sup>18</sup> and distinct  
207 medications within each class were identified according to generic drug name.

208

209

210 *Patient characteristics potentially associated with ADEs*

211 We measured a number of patient characteristics informed by previously published studies on risk  
212 factors for ADEs in the hospital and post-discharge setting<sup>9,19-21</sup> and included: patient  
213 demographics (age, sex), health service utilization in the one year prior to hospitalization (number  
214 of hospitalizations, ED visits, distinct medications dispensed), pre-admission chronic conditions  
215 (identified using ICD-9 & ICD-10 codes; appendix Table A2), number of pre-admission chronic  
216 conditions, characteristics of the hospital stay (institution admitted from, reason for admission,  
217 main patient service, discharge disposition), the number of medications dispensed overall in the  
218 30-days following discharge as well as the number of new medications.

219

220 *Outcomes*

221 The primary outcome for this study was the occurrence of ADEs (identified using ICD-10 codes  
222 for ED visits and hospital readmissions; Appendix Table A3)<sup>22</sup> in 30-days following the index  
223 hospital discharge. Discharge date for the first eligible hospital episode was the index date.

224

225 **STATISTICAL ANALYSIS**

226 Descriptive statistics were used to summarize patient characteristics for the entire study cohort. To  
227 characterize medication use in the 30-days following discharge, the prevalence of each medication  
228 class was calculated (overall and incidence of new use) and the most common drugs in each class  
229 were identified.

230 Identification of medication prescribing clusters at hospital discharge was conducted using  
231 latent class analysis (LCA). LCA is a model-based method of clustering that identifies unique  
232 groups or segments in a population when we do not have a variable that records group



233 membership.<sup>23</sup> Cluster identification was based on medications dispensed 30-days post-  
234 hospitalization using medication classes (3-digit ATC codes). Each medication class was included  
235 as a binary variable at the patient level (patient dispensed a medication in this class yes/no). LCA  
236 was performed successively where we started with a single class model under the assumption that  
237 all patients were dispensed the same combinations of medications following discharge. Then,  
238 increasing numbers of classes were added one at a time. The optimal number of subgroups (“n”)  
239 was decided by considering the best fit for the data (identified using the Bayesian information  
240 criterion [BIC]) and clinical interpretability of each cluster. The best fitting model with n-classes  
241 was identified and each patient was assigned to their most likely class based on these model  
242 probabilities. The difference in the prevalence of each medication class within a particular cluster  
243 vs the prevalence of medication class in the overall population was calculated (e.g., prevalence of  
244 patients dispensed diuretics in cluster 1- prevalence of patients dispensed diuretics overall) as was  
245 the prevalence of cluster membership among those dispensed each medication class (e.g., number  
246 of patients in cluster 1 dispensed diuretics/total number of patients dispensed diuretics). Clinicians  
247 on the team reviewed each cluster and agreed upon a clinically meaningful description for each.  
248 Patient descriptives were calculated according to medication cluster membership. The crude risk  
249 of ADEs were calculated overall and for each cluster separately.

250       Multivariable logistic regression models were constructed to assess the potential  
251 association between membership to a particular medication cluster and ADEs post-discharge,  
252 while also evaluating other patient characteristics historically associated with ADEs. The binary  
253 outcome was the occurrence of at least one ADE in the 30-days following discharge. Both cluster  
254 membership and patient characteristics were included as covariates in the same model. Six separate  
255 logistic models were constructed where a binary variable was included for each cluster separately

256 in order to obtain the adjusted risk associated with belonging to a given cluster compared to all  
257 other clusters. Adjusted odds ratios and 95% confidence intervals were obtained for each covariate  
258 in the logistic regression model.

259

### 260 *Sensitivity analysis*

261 While ICD-10 code sets to identify ADE's have high specificity, they only have a sensitivity of up  
262 to 28%.<sup>24-26</sup> All cause events will capture events that medications likely did not contribute to (e.g.,  
263 pneumonia, sepsis, urinary tract infection), however, ADEs can also manifest as worsening of a  
264 patient's underlying disease (e.g., statin non-adherence and occurrence of stroke)<sup>27</sup> which would  
265 not be coded as being medication related. Therefore, in order to confirm the robustness of our  
266 results, and capture adverse events that were not necessarily coded as drug related, we re-  
267 conducted our primary analysis using a composite outcome of all cause emergency department  
268 visits or mortality in 30-days.

## 269 **RESULTS**

270 Overall, 837,655 patients were admitted to hospital in Ontario between March 1 2016 and February  
271 28 2017. After excluding those who were younger than 66 (n=544,064; 65%), those who were  
272 admitted from another acute care facility (n=10,720; 1%), and patients who did not have eligible  
273 medications dispensed 30-days post discharge prior to another healthcare encounter (n=84,539;  
274 10%), 188,354 patients were included in the study cohort (Figure 1).

275 Median age (IQR) of the study participants was 77 (71-84) years and 53% were female. In  
276 the 1-year prior to the index hospital stay, 18% of patients had at least one hospitalization, patients  
277 had a median (IQR) of 2 (1-3) ED visits, 9 (6-13) medications dispensed, and 2 (1-3) chronic  
278 conditions. The most common chronic conditions included cancer (32% of patients), diabetes

279 (26%) and osteoarthritis (25%). Most patients were admitted from the community and were not  
280 receiving home care (84%), 11% were admitted from long-term care and 5% were admitted from  
281 an outpatient clinic. The most common services patients were admitted to included general  
282 medicine (43%), orthopedic surgery (15%), general surgery (10%) and cardiology (8%). In the 30-  
283 days following discharge, a median (IQR) of 3 medications (2-6) were dispensed overall and 79%  
284 of patients had at least one new medication dispensed (Table 1). The top 5 most common  
285 medication classes (including new and continued medications) included: analgesics (40%  
286 prevalence, most common were hydromorphone and oxycodone), antithrombotics (30%  
287 prevalence, most common warfarin and clopidogrel), lipid modifying agents (25% prevalence,  
288 most common atorvastatin), drugs for acid related disorders (24% prevalence, most common  
289 pantoprazole) and antibacterials for systemic use (23% prevalence, most common ciprofloxacin,  
290 cefalexin, amoxicillin clavulanic acid cefuroxime) (Table 2).

291 Goodness of fit statistics indicated that the study population consisted of 6 separate  
292 clusters of medication dispensing patterns. **Cluster 1** (“cardiovascular” cluster, n=25,995; 14% of  
293 study cohort) was characterized by use of beta blocking agents (e.g., metoprolol), cholesterol  
294 lowering agents (e.g., atorvastatin), antithrombotics (e.g., warfarin, clopidogrel), agents acting on  
295 the renin angiotensin system (e.g., ramipril, perindopril) and cardiac therapy (e.g., digoxin,  
296 nitroglycerin). Patients in this cluster were more likely to be male, had a higher prevalence of acute  
297 myocardial infarction, arrhythmia, heart failure and coronary artery syndrome, were more likely  
298 to be admitted from home without homecare, to be admitted for a circulatory related diagnosis,  
299 and receive care on a cardiology unit (Table 1). **Cluster 2** (“respiratory” cluster, n=47,747; 26%)  
300 was characterized by use of corticosteroids for systemic use (e.g., prednisone) drugs for obstructive  
301 airway diseases (e.g., salbutamol) and antivirals for systemic use (e.g., oseltamivir). Patients in this

302 cluster had a higher prevalence of COPD and were more likely to have been admitted for a  
303 respiratory related diagnosis and to receive care on a general medicine unit (Table 1). **Cluster 3**  
304 (“complex care needs” cluster, n=22,147; 12%) was characterized by use of antidepressants (e.g.,  
305 trazodone, escitalopram) antipsychotics (e.g., quetiapine, risperidone), drugs for acid related  
306 disorders (e.g., pantoprazole), gabapentinoids (e.g., gabapentin, pregabalin), analgesics (e.g.,  
307 hydromorphone, oxycodone), drugs for constipation (e.g., docusate), thyroid therapy (e.g.,  
308 levothyroxine) and anti-parkinson's drugs (e.g., carbidopa/levodopa). Patients in this cluster were  
309 more likely to be female, had a greater number of medications dispensed prior to admission, were  
310 more likely to have dementia, any mental health disorder, or mood/anxiety disorder, were more  
311 likely to have been admitted from long term care, be admitted for a mental health, nervous system  
312 or injury related diagnosis and were most likely to receive care on a general medicine unit. (Table  
313 1) **Cluster 4** (“cardiovascular and metabolic”; n=28,924, 15%) was characterized by use of  
314 cholesterol lowering agents, beta blocking agents, drugs for acid related disorders, diuretics (e.g.,  
315 furosemide), agents acting on the renin-angiotensin system, drugs used in diabetes (e.g.,  
316 metformin), calcium channel blockers (e.g., amlodipine), antipsychotics, anti-thrombotics, anti-  
317 gout preparations (e.g., allopurinol) and other anti-hypertensives (e.g., hydralazine). Patients in  
318 this cluster had more medications dispensed prior to admission, were more likely to have  
319 cardiovascular conditions, diabetes and renal disease, be admitted from long term care, be admitted  
320 for a circulatory related diagnosis, be on a general medicine or cardiology unit and had a high  
321 proportion of multiple new medications dispensed. (Table 1) **Cluster 5** (“infection” cluster;  
322 n=17,867, 10%) was characterized by use of antibacterials for systemic use (e.g., ciprofloxacin,  
323 cefalexin, amoxicillin & beta-lactamase inhibitors) and anti-fungals (e.g., metronidazole). Patients  
324 in this cluster were more likely to be male, have cancer, be admitted from home without homecare

325 and be admitted for a malignancy, respiratory or digestive related diagnosis (Table 1). **Cluster 6**  
326 (“surgical” cluster; n=45,684, 24%) was characterized by use of analgesics, anti-thrombotics,  
327 drugs for constipation and anti-inflammatory products (e.g., celecoxib, meloxicam). Patients in  
328 this cluster were slightly younger, more likely to have osteoarthritis and arthritis, be admitted from  
329 home, be admitted for a malignancy, or musculoskeletal related diagnosis, and be on an orthopedic  
330 surgery unit (Table 1).

331 Overall, 12,680 (6.7%) patients had an ADE in the 30-days following discharge. The most  
332 common diagnosis associated with ADEs across the majority of clusters was acute kidney failure  
333 and volume depletion. Of note, enterocolitis due to *Clostridium difficile* was a common ADE in  
334 cluster 5 (infection) and pulmonary embolism in the absence of acute cardiorespiratory disease  
335 was common in cluster 6 (surgical). Crude risk of ADEs was highest for those in cluster 4  
336 (cardiovascular and metabolic; 8.9%) and lowest for those in cluster 6 (surgical; 4.6%) (Table 3).

337 Our multivariable model included both variables indicating cluster membership as well as  
338 patient level variables, therefore, the interpretation of the odds ratio for a given covariate in the  
339 model is the risk of ADE’s associated with presence of a characteristic (vs reference) after  
340 accounting for the other patient characteristics included in the model. After considering other  
341 patient characteristics, those in the respiratory cluster had the highest risk of ADEs (adjusted odds  
342 ratio [aOR]: 1.12, 95% CI: 1.08-1.17) compared to all the other clusters while those in the  
343 neurocognitive & complex care needs cluster had the lowest risk (aOR:0.82, 95% CI: 0.77-0.87).  
344 There was no difference in the risk of ADEs among patients in the cardiovascular, metabolic  
345 syndrome, infection and surgical clusters when comparing each cluster to all other clusters. (Table  
346 3)

347 Patient level factors that were also associated with an increased risk of ADEs included age,  
348 increasing healthcare service use in the year prior to admission (hospitalizations and ED visits), a  
349 greater number of pre-admission medications dispensed, presence of heart failure, arrhythmia,  
350 renal disease and liver disease, being admitted from long term care, being admitted from the ED,  
351 increasing length of stay, a higher Charlson Comorbidity Score, and a greater number of new  
352 medications dispensed in the 30-days following discharge (Table 3). Of all the variables in the  
353 model, belonging to the respiratory cluster, presence of renal disease, liver disease and heart failure  
354 were associated with the highest risk of ADEs.

355 Our sensitivity analyses indicated that the direction of the point estimates for the  
356 association between the characteristics included in our multivariable model and ED visits/mortality  
357 was similar when compared to the primary analysis. However, the magnitude of these associations  
358 was higher for the infection and surgical clusters. (Appendix Table A5).

## 359 **DISCUSSION**

360  
361 In this population-based retrospective cohort study of older hospitalized adults, we identified 6  
362 clusters of medication prescribing patterns at hospital discharge; cardiovascular, respiratory,  
363 complex care needs, metabolic syndrome, infection and surgical clusters. After accounting for  
364 other factors known to increase the risk of ADE after discharge, patients in the respiratory cluster  
365 had the highest risk of an ADE after discharge while those in the complex care needs cluster had  
366 the lowest risk. We also confirmed that a number of previously reported patient characteristics  
367 were associated with an increased risk of ADEs, for example, the overall number of medications,  
368 the addition of new medications, as well as the presence of heart failure, renal disease and liver  
369 disease.

370 A systematic review published in 2018 aimed to determine risk factors for medication  
371 related harm among older adults after hospital discharge.<sup>1</sup> Only 3 of the 8 included studies  
372 conducted multivariable analyses to evaluate risk factors for medication-related harm. Among  
373 these studies, only select medication classes (as opposed to combinations or clusters of medication  
374 classes) and diagnoses were included in the multivariable analyses. The majority of studies were  
375 of moderate quality and substantial methodological heterogeneity was identified with respect to  
376 how related harm was measured. A higher absolute number of medications,<sup>28,29</sup> the addition of  
377 new medications at discharge,<sup>30</sup> warfarin<sup>28,29</sup>, furosemide<sup>31</sup>, a lower Mini-Mental State  
378 Examination score<sup>30</sup> and female sex<sup>30</sup> were all independent risk factors for medication harm  
379 following hospitalization. Since this systematic review was published, three other studies have  
380 evaluated risk factors for medication-related harm following a hospital stay.<sup>2,9,32</sup> Risk factors from  
381 these studies included the number of medication changes, prior hospitalizations preceding the  
382 index admission, older age, past adverse drug reaction(s), prescriptions for antiplatelet drugs,  
383 antidiabetic drugs, corticosteroids and again, a higher absolute number of medications were risk  
384 factors. Consistent risk factors for an increased risk of ADEs post hospital discharge are older age,  
385 the absolute number of medications and the addition of new medications at discharge, which we  
386 also confirmed in our analysis. However, we found no other study that specifically evaluated  
387 medication clusters or combinations of medications as an independent risk factor for ADEs post  
388 discharge.

389 The results of this study inform clinical practice in two important ways. First, this study  
390 provides evidence that medications tend to be prescribed in readily identifiable, predictable  
391 medication clusters. Furthermore, some clusters differentially impact the risk of post hospital  
392 ADEs independent of patient characteristics and the number of prescribed medications. Therefore,

393 these results could inform clinicians about new potentially modifiable risk factors for ADEs, such  
394 as newly added combinations of medications, which may be important to review prior to the patient  
395 being discharged. For example, in the respiratory cluster, patients were most likely to be using a  
396 combination of corticosteroids, drugs for obstructive airway diseases and antivirals, and patients  
397 in this cluster also had the highest independent risk of ADEs post-discharge. Thus, medications  
398 prescribed to patients in this cluster (especially new medications) may be important to review prior  
399 to discharge, or patients may require counseling with respect to expected or predictable side effects  
400 from this medication cluster (e.g., gastrointestinal symptoms from systemic corticosteroids and  
401 oseltamivir, or delirium from combinations of anticholinergic inhalers and corticosteroids).

402         Second, similar to previous studies, better understanding of non-modifiable patient-level  
403 factors associated with an increased risk of ADEs in the 30-days post discharge (e.g., older age,  
404 presence of heart failure etc.) can inform clinicians which patients may benefit most from resource-  
405 intensive interventions to decrease ADEs (e.g., home care post discharge or targeted education  
406 related to signs and symptoms to monitor for related to a potential ADE.) For example, presence  
407 of heart failure, renal disease or liver disease could be important markers for patients at high risk  
408 of experiencing an ADE and should have their medications reviewed by a pharmacist prior to  
409 discharge. Interestingly, although the neurocognitive & complex care needs cluster was associated  
410 with the highest crude risk of ADEs, after considering other patient characteristics, this cluster was  
411 not associated with an increased risk of ADEs compared to any of the other clusters. This could  
412 indicate that these patients may be well known to be “high risk” and are receiving adequate support  
413 with respect to their medications in the post discharge period. A limitation of our study is that we  
414 did not have information on factors such as involvement of a pharmacist or consultation with  
415 geriatrics prior to discharge.



416           There are other limitations associated with this study that are important to keep in mind.  
417   First, although patients were dispensed particular medications, they might not have taken these  
418   medications as prescribed. This is a limitation associated with all studies which use dispensing  
419   data to capture drug exposure. Second, we did not have access to clinical data to include in our  
420   models (e.g., renal function, sodium levels) which may have led to unmeasured confounding.  
421   Third, the data analyzed in this study was from 2016/2017 and the prescribing patterns for certain  
422   medications have changed over this time period. For example, the use of direct oral anticoagulants  
423   has increased dramatically in the past 5 years. Lastly, although we analyzed both ADEs and  
424   emergency department visits as outcomes and found consistent results between the two models,  
425   it's still important to acknowledge that use of ICD10 codes to measure ADEs will miss many  
426   outcomes which are drug related and ED visits will also capture a number of events which are not  
427   related to medications. Additional research is required with respect to valid measures of ADEs  
428   using administrative health data.

429           Despite these limitations, this study is an important step towards personalized medicine as  
430   it relates to appropriate prescribing. Identifying patients who are taking high risk clusters of  
431   medications could lead to interventions that improve the safety of medication use following  
432   hospitalization. By considering a patient's whole drug regimen, in combination with their  
433   characteristics, we can take steps towards a more holistic approach to prescribing, not just focusing  
434   on treating single conditions or addressing single high risk drug classes in isolation.

435           In conclusion, this study suggests that ADEs post hospital discharge are linked to  
436   identifiable clusters of medications, in addition to non-modifiable patient characteristics, such as  
437   age and certain comorbidities. This information may help clinicians and researchers better

438 understand what patient populations and which types of interventions may benefit patients, to  
439 reduce their risk of experiencing an ADE.

440

441

442

443

444

445

446

447

448

449

450

451

452

453

454

455

456

457

458

459

460

461 **STATEMENTS AND DECLARATIONS**

462 **Conflict of Interest:** Dr. McDonald receives salary support for research from the Fond de  
463 recherche santé Québec and is the owner and chief scientific officer of MedSafer, a software that  
464 helps guide clinicians through the process of deprescribing for older adults with polypharmacy  
465 (the intellectual property is jointly held with McGill University). Authors have no other competing  
466 interests to disclose.

467

468 **Author Contributions**

469 Conceptualization - DW; Methodology - DW; Validation - DW, EGM; Formal Analysis - DW,  
470 XM; Investigation - All authors; Resources - DW, WPW; Data Curation - WPW; Writing -  
471 Original Draft - DW, EGM, LLS, TT, LM; Writing - Review and Editing - All authors;  
472 Visualization DW, EGM

473

474 **Sponsors Role:** N/A

475

476

477

478

479

480

481

482

483

484

485

486

487

488

489

490

491

492

493

494  
495  
496  
497  
498  
499  
500  
501  
502  
503  
504  
505  
506  
507  
508  
509  
510  
511  
512  
513  
514  
515  
516  
517  
518  
519  
520  
521  
522  
523  
524  
525  
526  
527  
528  
529  
530  
531  
532  
533  
534  
535  
536  
537  
538  
539  
540  
541  
542  
543

## REFERENCES

1. Parekh N, Ali K, Page A, Roper T, Rajkumar C. Incidence of Medication-Related Harm in Older Adults After Hospital Discharge: A Systematic Review. *J Am Geriatr Soc*. 2018;66:1812–1822.
2. Uitvlugt EB, Janssen MJA, Siegert CEH, Kneepkens EL, van den Bemt BJB, van den Bemt PMLA, Karapinar-Çarkit F. Medication-Related Hospital Readmissions Within 30 Days of Discharge: Prevalence, Preventability, Type of Medication Errors and Risk Factors. *Front Pharmacol*. 2021;12:567424.
3. Weir DL, Lee TC, McDonald EG, Motulsky A, Abrahamowicz M, Morgan S, Buckeridge D, Tamblyn R. Both New and Chronic Potentially Inappropriate Medications Continued at Hospital Discharge Are Associated With Increased Risk of Adverse Events. *J Am Geriatr Soc* [Internet]. [cited 2020 Mar 31];n/a. Available from: <https://onlinelibrary.wiley.com/doi/abs/10.1111/jgs.16413>
4. Bates DW, Cullen DJ, Laird N, Petersen LA, Small SD, Servi D, Laffel G, Sweitzer BJ, Shea BF, Hallisey R. Incidence of adverse drug events and potential adverse drug events. Implications for prevention. ADE Prevention Study Group. *JAMA*. 1995;274:29–34.
5. Tamblyn R, Abrahamowicz M, Buckeridge DL, Bustillo M, Forster AJ, Girard N, Habib B, Hanley J, Huang A, Kurteva S, Lee TC, Meguerditchian AN, Moraga T, Motulsky A, Petrella L, Weir DL, Winslade N. Effect of an Electronic Medication Reconciliation Intervention on Adverse Drug Events: A Cluster Randomized Trial. *JAMA Netw Open*. 2019;2:e1910756–e1910756.
6. Harris CM, Sridharan A, Landis R, Howell E, Wright S. What Happens to the Medication Regimens of Older Adults During and After an Acute Hospitalization?: *J Patient Saf*. 2013;9:150–153.
7. Viktil KK, Blix HS, Eek AK, Davies MN, Moger TA, Reikvam A. How are drug regimen changes during hospitalisation handled after discharge: a cohort study. *BMJ Open*. 2012;2:e001461.
8. Weir DL, Motulsky A, Abrahamowicz M, Lee TC, Morgan S, Buckeridge DL, Tamblyn R. Challenges at Care Transitions: Failure to Follow Medication Changes Made at Hospital Discharge. *Am J Med* [Internet]. 2019 [cited 2019 Jul 10]; Available from: <https://linkinghub.elsevier.com/retrieve/pii/S0002934319304309>
9. Parekh N, Ali K, Davies JG, Stevenson JM, Banya W, Nyangoma S, Schiff R, Cammen T van der, Harchowal J, Rajkumar C. Medication-related harm in older adults following hospital discharge: development and validation of a prediction tool. *BMJ Qual Saf* [Internet]. 2019 [cited 2019 Dec 4]; Available from: <http://qualitysafety.bmj.com/content/early/2019/09/16/bmjqs-2019-009587>
10. Stevenson JM, Williams JL, Burnham TG, Prevost AT, Schiff R, Erskine SD, Davies JG. Predicting adverse drug reactions in older adults; a systematic review of the risk prediction models [Internet]. *Clin. Interv. Aging*. 2014 [cited 2019 Dec 8]; Available from: <https://www.dovepress.com/predicting-adverse-drug-reactions-in-older-adults-a-systematic-review-peer-reviewed-fulltext-article-CIA>
11. Boyd CM; L B; Weiss, C; Wolff, J; Clark, R; Richards, T. Multimorbidity Pattern Analyses and Clinical Opportunities: Diabetes. *Faces Medicaid Data Ser*. 2010;
12. Mutasingwa DR, Ge H, Upshur REG. How applicable are clinical practice guidelines to elderly patients with comorbidities? *Can Fam Physician Med Fam Can*. 2011;57:e253-262.
13. Hillas G, Perlikos F, Tsiligianni I, Tzanakis N. Managing comorbidities in COPD. *Int J Chron Obstruct Pulmon Dis*. 2015;10:95–109.
14. McDonald EG, Wu PE, Rashidi B, Forster AJ, Huang A, Pilote L, Papillon-Ferland L, Bonnici A, Tamblyn R, Whitty R, Porter S, Battu K, Downar J, Lee TC. The MedSafer Study: A Controlled Trial of an Electronic Decision Support Tool for Deprescribing in Acute Care. *J Am Geriatr Soc*. 2019;67:1843–1850.
15. Zerah L, Henrard S, Wilting I, O’Mahony D, Rodondi N, Dalleur O, Dalton K, Knol W, Haschke M, Spinewine A. Prevalence of drug-drug interactions in older people before and after hospital

- 544 admission: analysis from the OPERAM trial. *BMC Geriatr.* 2021;21:571.
- 545 16. Living and Dying in Ontario: An Opportunity to Improve Health Information [Internet]. [cited 2021  
546 May 24]; Available from: [https://www.ices.on.ca/Publications/Atlases-and-Reports/2008/Living-](https://www.ices.on.ca/Publications/Atlases-and-Reports/2008/Living-and-dying-in-Ontario)  
547 [and-dying-in-Ontario](https://www.ices.on.ca/Publications/Atlases-and-Reports/2008/Living-and-dying-in-Ontario)
- 548 17. Levy AR, O'Brien BJ, Sellors C, Grootendorst P, Willison D. Coding accuracy of administrative  
549 drug claims in the Ontario Drug Benefit database. *Can J Clin Pharmacol J Can Pharmacol Clin.*  
550 2003;10:67–71.
- 551 18. WHOCC - ATC/DDD Index [Internet]. [cited 2021 May 4]; Available from:  
552 [https://www.whooc.no/atc\\_ddd\\_index/](https://www.whooc.no/atc_ddd_index/)
- 553 19. Gallagher PF, O'Connor MN, O'Mahony D. Prevention of Potentially Inappropriate Prescribing for  
554 Elderly Patients: A Randomized Controlled Trial Using STOPP/START Criteria. *Clin Pharmacol*  
555 *Ther.* 2011;89:845–854.
- 556 20. Nair NP, Chalmers L, Connolly M, Bereznicki BJ, Peterson GM, Curtain C, Castelino RL,  
557 Bereznicki LR. Prediction of Hospitalization due to Adverse Drug Reactions in Elderly  
558 Community-Dwelling Patients (The PADR-EC Score). *PLOS ONE.* 2016;11:e0165757.
- 559 21. O'Connor MN, O'Sullivan D, Gallagher PF, Eustace J, Byrne S, O'Mahony D. Prevention of  
560 Hospital-Acquired Adverse Drug Reactions in Older People Using Screening Tool of Older  
561 Persons' Prescriptions and Screening Tool to Alert to Right Treatment Criteria: A Cluster  
562 Randomized Controlled Trial. *J Am Geriatr Soc.* 2016;64:1558–1566.
- 563 22. Hohl CM, Karpov A, Reddekopp L, Stausberg J. ICD-10 codes used to identify adverse drug events  
564 in administrative data: a systematic review. *J Am Med Inform Assoc JAMIA.* 2014;21:547–557.
- 565 23. MacDonald K. Latent Class Analysis (LCA) in Stata. :58.
- 566 24. Hohl CM, Kuramoto L, Yu E, Rogula B, Stausberg J, Sobolev B. Evaluating adverse drug event  
567 reporting in administrative data from emergency departments: a validation study. *BMC Health Serv*  
568 *Res* [Internet]. 2013 [cited 2019 Jan 23];13. Available from:  
569 <https://bmchealthservres.biomedcentral.com/articles/10.1186/1472-6963-13-473>
- 570 25. Honigman B, Lee J, Rothschild J, Light P, Pulling RM, Yu T, Bates DW. Using computerized data  
571 to identify adverse drug events in outpatients. *J Am Med Inform Assoc JAMIA.* 2001;8:254–266.
- 572 26. Field TS, Gurwitz JH, Harrold LR, Rothschild JM, Debellis K, Seger AC, Fish LS, Garber L,  
573 Kelleher M, Bates DW. Strategies for Detecting Adverse Drug Events among Older Persons in the  
574 Ambulatory Setting. *J Am Med Inform Assoc JAMIA.* 2004;11:492–498.
- 575 27. Ravn-Nielsen LV, Duckert M-L, Lund ML, Henriksen JP, Nielsen ML, Eriksen CS, Buck TC,  
576 Pottegård A, Hansen MR, Hallas J. Effect of an In-Hospital Multifaceted Clinical Pharmacist  
577 Intervention on the Risk of Readmission: A Randomized Clinical Trial. *JAMA Intern Med.*  
578 2018;178:375–382.
- 579 28. Hanlon JT, Pieper CF, Hajjar ER, Sloane RJ, Lindblad CI, Ruby CM, Schmader KE. Incidence and  
580 predictors of all and preventable adverse drug reactions in frail elderly persons after hospital stay. *J*  
581 *Gerontol A Biol Sci Med Sci.* 2006;61:511–515.
- 582 29. Letrilliant L, Hanslik T, Biour M, Fagot JP, Guiguet M, Flahault A. Postdischarge adverse drug  
583 reactions in primary care originating from hospital care in France: a nationwide prospective study.  
584 *Drug Saf.* 2001;24:781–792.
- 585 30. Gray SL, Mahoney JE, Blough DK. Adverse drug events in elderly patients receiving home health  
586 services following hospital discharge. *Ann Pharmacother.* 1999;33:1147–1153.
- 587 31. Marusic S, Sicaja M, Obreli Neto PR, Franic M, Marinovic I, Bacic-Vrca V. Adverse drug reactions  
588 in elderly patients following discharge from an internal medicine clinic. *Int J Clin Pharmacol Ther.*  
589 2014;52:906–913.
- 590 32. Aubert CE, Rodondi N, Netzer S, Dalleur O, Spinewine A, Maanen CD, Knol W, O'Mahony D,  
591 Aujesky D, Donzé J. Predictors of 1-year drug-related admissions in older multimorbid hospitalized  
592 adults. *J Am Geriatr Soc* [Internet]. [cited 2022 Jan 27];n/a. Available from:  
593 <https://onlinelibrary.wiley.com/doi/abs/10.1111/jgs.17667>  
594

First hospital episode in Ontario between March 1 2016 and February 28 2017  
**n= 837, 655 patients**

**Exclusions**

N= 554,064 patients younger than 65

N=10,720 patients admitted from acute care

N= 71, 086 patients did not have medications dispensed in 30-days post discharge prior to another healthcare encounter

N=3,928 patients with dispensed medications which did not have corresponding ATC code

N=9,525 patients without at least one medication dispensed in class with prevalence of  $\geq 1\%$  in cohort

**N=188,354 patients** 66 years of age and older discharged home or to long term care with eligible dispensed medications in the 30-days following hospital discharge prior to another healthcare encounter

**Table 1.** Patient characteristics overall and according to cluster

| Demographics                                        | Overall<br>(n=188,354) | Cluster 1<br>Cardio<br>(n=25,995) | Cluster 2<br>Respiratory<br>(n=47,737) | Cluster 3<br>Complex care<br>needs<br>(n=22,147) | Cluster 4<br>Cardio-<br>vascular and<br>metabolic<br>(n=28,924) | Cluster 5<br>Infection<br>(n=17,867) | Cluster 6<br>Surgical<br>(n=45,684) |
|-----------------------------------------------------|------------------------|-----------------------------------|----------------------------------------|--------------------------------------------------|-----------------------------------------------------------------|--------------------------------------|-------------------------------------|
| <b>Age, median (IQR)</b>                            | 77 (71-84)             | 77 (71-84)                        | 78 (71-84)                             | 81 (74-88)                                       | 81 (74-87)                                                      | 75 (70-81)                           | 73 (69-79)                          |
| 66-75                                               | 83,885 (44.5)          | 11,275 (43.4)                     | 19,583 (41.0)                          | 6,711 (30.3)                                     | 8,503 (29.4)                                                    | 9,261 (51.8)                         | 28,552 (62.5)                       |
| 76-85                                               | 61,692 (32.8)          | 8,801 (33.9)                      | 16,291 (34.1)                          | 7,272 (32.8)                                     | 10,579 (36.6)                                                   | 5,845 (32.7)                         | 12,904 (28.3)                       |
| 85+                                                 | 42,777 (22.7)          | 5,919 (22.8)                      | 11,863 (24.9)                          | 8,164 (36.9)                                     | 9,842 (34.0)                                                    | 2,761 (15.5)                         | 4,228 (9.3)                         |
| <b>Sex</b>                                          |                        |                                   |                                        |                                                  |                                                                 |                                      |                                     |
| Male                                                | 88,717 (47.1)          | 14,032 (54.0)                     | 22,919 (48.0)                          | 7,607 (34.4)                                     | 13,050 (45.1)                                                   | 10,424 (58.3)                        | 20,685 (45.3)                       |
| Female                                              | 99,637 (52.9)          | 11,963 (46.0)                     | 24,818 (52.0)                          | 14,540 (65.7)                                    | 15,874 (54.9)                                                   | 7,443 (41.7)                         | 24,999 (54.7)                       |
| <b>Health services 1-year prior to admission</b>    |                        |                                   |                                        |                                                  |                                                                 |                                      |                                     |
| <b>Hospitalizations, mean (SD)</b>                  | 0.3 (0.7)              | 0.2 (0.6)                         | 0.3 (0.8)                              | 0.4 (0.9)                                        | 0.5 (0.9)                                                       | 0.3 (0.7)                            | 0.2 (0.5)                           |
| 0                                                   | 153,601 (81.6)         | 22,002 (84.6)                     | 38,747 (81.2)                          | 16,774 (75.7)                                    | 21,174 (73.2)                                                   | 14,826 (83.0)                        | 40,078 (87.3)                       |
| 1                                                   | 23,792 (12.6)          | 2,937 (11.3)                      | 6,011 (12.6)                           | 3,497 (15.8)                                     | 4,821 (16.7)                                                    | 2,117 (11.9)                         | 4,409 (9.7)                         |
| 2                                                   | 6,854 (3.6)            | 702 (2.7)                         | 1,868 (3.9)                            | 1,149 (5.2)                                      | 1,714 (5.9)                                                     | 582 (3.3)                            | 839 (1.8)                           |
| 3                                                   | 2,342 (1.2)            | 214 (0.8)                         | 615 (1.3)                              | 424 (1.9)                                        | 662 (2.3)                                                       | 194 (1.1)                            | 233 (0.5)                           |
| 4+                                                  | 1,765 (0.9)            | 140 (0.5)                         | 4 (1.0)                                | 303 (1.4)                                        | 553 (1.9)                                                       | 148 (0.8)                            | 125 (0.3)                           |
| <b>Emergency department visits, median (IQR)</b>    | 2 (1-3)                | 2 (1-3)                           | 2 (1-4)                                | 2 (1-4)                                          | 2 (1-4)                                                         | 2 (1-4)                              | 1 (0-2)                             |
| 0                                                   | 20,205 (10.7)          | 1,327 (5.1)                       | 1,584 (3.3)                            | 768 (3.5)                                        | 886 (3.1)                                                       | 1,013 (5.7)                          | 14,628 (32.0)                       |
| 1                                                   | 61,425 (32.6)          | 10,785 (41.5)                     | 15,836 (33.2)                          | 6,867 (31.0)                                     | 8,893 (30.8)                                                    | 5,655 (31.7)                         | 13,389 (29.3)                       |
| 2                                                   | 38,629 (20.5)          | 5,839 (22.5)                      | 10,489 (22.0)                          | 4,924 (22.2)                                     | 6,346 (21.9)                                                    | 3,832 (21.5)                         | 7,199 (15.8)                        |
| 3                                                   | 23,781 (12.6)          | 3,362 (12.9)                      | 6,689 (14.0)                           | 3,259 (14.7)                                     | 4,171 (14.4)                                                    | 2,396 (13.4)                         | 3,904 (8.6)                         |
| 4                                                   | 14,099 (7.5)           | 1,706 (6.6)                       | 3,946 (8.3)                            | 2,073 (9.4)                                      | 2,819 (9.8)                                                     | 1,440 (8.1)                          | 2,115 (2.6)                         |
| 5                                                   | 8,387 (4.5)            | 974 (3.8)                         | 2,439 (5.1)                            | 1,226 (5.5)                                      | 1,685 (5.8)                                                     | 893 (5.0)                            | 1,170 (2.6)                         |
| 6+                                                  | 21,828 (11.6)          | 2,002 (7.7)                       | 6,754 (14.2)                           | 3,030 (13.7)                                     | 4,124 (14.3)                                                    | 2,638 (14.8)                         | 3,280 (7.2)                         |
| <b>Distinct medications dispensed, median (IQR)</b> | 9 (6-13)               | 7 (5-11)                          | 9 (6-13)                               | 11 (8-15)                                        | 13 (9-17)                                                       | 8 (5-12)                             | 7 (4-10)                            |
| 0                                                   | 3,838 (2.0)            | 893 (3.4)                         | 906 (1.9)                              | 215 (1.0)                                        | 166 (0.6)                                                       | 432 (2.4)                            | 1,226 (2.7)                         |
| 1-3                                                 | 18,830 (10.0)          | 3,507 (13.5)                      | 4,529 (9.5)                            | 678 (3.1)                                        | 415 (1.4)                                                       | 2,201 (12.3)                         | 7,500 (16.4)                        |
| 4-6                                                 | 36,480 (19.4)          | 6,233 (24.0)                      | 9,662 (20.2)                           | 2,721 (12.3)                                     | 1,930 (6.7)                                                     | 3,842 (21.5)                         | 12,092 (26.5)                       |
| 7-9                                                 | 42,226 (22.4)          | 6,584 (25.3)                      | 11,090 (23.2)                          | 4,850 (21.9)                                     | 4,842 (16.7)                                                    | 4,050 (22.7)                         | 10,810 (23.7)                       |
| 10-12                                               | 35,485 (18.8)          | 4,488 (17.3)                      | 9,212 (19.3)                           | 4,895 (22.1)                                     | 6,581 (22.8)                                                    | 3,212 (18.0)                         | 7,097 (15.5)                        |



|                                                   |                |                |                |                |                |                |                |
|---------------------------------------------------|----------------|----------------|----------------|----------------|----------------|----------------|----------------|
| 13-15                                             | 24,237 (12.9)  | 2,427 (9.3)    | 5,986 (12.5)   | 3,898 (17.6)   | 6,031 (20.9)   | 2,037 (11.4)   | 3,858 (8.4)    |
| 16+                                               | 27,258 (14.5)  | 1,863 (7.2)    | 6,352 (13.3)   | 4,890 (22.1)   | 8,959 (31.0)   | 2,093 (11.7)   | 3,101 (6.8)    |
| <b>Chronic Conditions</b>                         |                |                |                |                |                |                |                |
| Acute myocardial infarction                       | 9,082 (4.8)    | 4,048 (15.6)   | 1,390 (2.9)    | 412 (1.9)      | 2,335 (8.1)    | 248 (1.4)      | 649 (1.4)      |
| Arrhythmia                                        | 31,438 (16.7)  | 7,165 (27.6)   | 8,048 (16.9)   | 2,392 (10.8)   | 6,732 (23.3)   | 2,162 (12.1)   | 4,939 (10.8)   |
| Heart failure                                     | 25,163 (13.4)  | 5,315 (20.5)   | 6,527 (13.7)   | 2,013 (9.1)    | 7,990 (27.6)   | 1,329 (7.4)    | 1,989 (4.4)    |
| Coronary artery syndrome                          | 36,460 (19.4)  | 8,854 (34.1)   | 7,903 (16.6)   | 2,324 (10.5)   | 7,775 (26.9)   | 2,548 (14.3)   | 7,056 (15.5)   |
| Hypertension                                      | 64,884 (34.5)  | 9,742 (37.5)   | 15,468 (32.4)  | 5,630 (25.4)   | 9,531 (33.0)   | 5,908 (33.1)   | 18,605 (40.7)  |
| Stroke                                            | 13,757 (7.3)   | 3,322 (12.8)   | 3,113 (6.5)    | 1,855 (8.4)    | 3,201 (11.1)   | 573 (3.2)      | 1,693 (3.7)    |
| Cancer                                            | 60,711 (32.3)  | 6,909 (26.6)   | 15,974 (33.5)  | 5,840 (26.4)   | 7,172 (24.8)   | 7,324 (41.0)   | 17,492 (38.3)  |
| Diabetes                                          | 49,296 (26.2)  | 7,028 (27.0)   | 12,004 (25.2)  | 3,920 (17.7)   | 12,257 (42.4)  | 4,472 (25.0)   | 9,615 (21.1)   |
| Chronic obstructive pulmonary disease             | 22,586 (12.0)  | 1,866 (7.2)    | 8,066 (16.9)   | 2,959 (13.4)   | 4,139 (14.3)   | 2,774 (15.5)   | 2,782 (6.1)    |
| Asthma                                            | 9,450 (5.0)    | 929 (3.6)      | 2,996 (6.3)    | 944 (4.3)      | 1,511 (5.2)    | 1,073 (6.0)    | 1,997 (4.4)    |
| Dementia                                          | 24,366 (12.9)  | 1,951 (7.5)    | 5,763 (12.1)   | 7,502 (33.9)   | 5,804 (20.1)   | 1,152 (6.5)    | 2,194 (4.8)    |
| Mental health disorders                           | 15,778 (8.4)   | 1,626 (6.3)    | 3,959 (8.3)    | 2,985 (13.5)   | 2,694 (9.3)    | 1,270 (7.1)    | 3,244 (7.1)    |
| Mood and anxiety disorders                        | 31,411 (16.7)  | 3,119 (12.0)   | 7,905 (16.6)   | 6,162 (27.8)   | 5,180 (17.9)   | 2,493 (14.0)   | 6,552 (14.3)   |
| Osteoporosis                                      | 7,752 (4.1)    | 827 (3.2)      | 2,003 (4.2)    | 992 (4.5)      | 929 (3.2)      | 713 (4.0)      | 2,288 (5.0)    |
| Osteoarthritis                                    | 47,504 (25.2)  | 4,270 (16.4)   | 7,225 (15.1)   | 4,354 (19.7)   | 5,081 (17.6)   | 2,708 (15.2)   | 23,866 (52.2)  |
| Arthritis                                         | 30,588 (16.2)  | 3,190 (12.3)   | 6,487 (13.6)   | 3,000 (13.6)   | 4,003 (13.8)   | 2,526 (14.1)   | 11,382 (24.9)  |
| Rheumatoid arthritis                              | 5,682 (3.0)    | 259 (2.0)      | 1,377 (2.9)    | 717 (3.2)      | 749 (2.6)      | 466 (2.6)      | 1,844 (4.0)    |
| Renal disease                                     | 17,811 (9.5)   | 2,337 (9.0)    | 5,328 (11.2)   | 1,708 (7.7)    | 4,646 (16.1)   | 1,539 (8.6)    | 2,253 (4.9)    |
| Liver disease                                     | 2,002 (1.1)    | 167 (0.6)      | 750 (1.6)      | 204 (0.9)      | 333 (1.2)      | 195 (1.1)      | 353 (0.8)      |
| <b>Number of Chronic Conditions, Median (IQR)</b> | <b>2 (1-3)</b> | <b>3 (2-3)</b> | <b>2 (1-3)</b> | <b>2 (1-3)</b> | <b>3 (2-4)</b> | <b>2 (1-3)</b> | <b>2 (1-3)</b> |
| 0                                                 | 11,351 (6.0)   | 990 (3.8)      | 3,593 (7.5)    | 1,662 (7.5)    | 1,023 (3.5)    | 1,741 (9.7)    | 2,343 (5.1)    |
| 1                                                 | 39,302 (20.9)  | 4,654 (17.9)   | 10,787 (22.6)  | 5,375 (24.3)   | 4,266 (14.8)   | 4,623 (25.9)   | 9,597 (21.0)   |
| 2                                                 | 52,236 (27.7)  | 7,163 (27.6)   | 12,915 (27.1)  | 5,869 (26.5)   | 6,739 (23.3)   | 5,136 (28.8)   | 14,414 (31.6)  |
| 3                                                 | 41,707 (22.1)  | 6,346 (24.4)   | 10,028 (21.0)  | 4,539 (20.5)   | 6,589 (22.8)   | 3,352 (18.8)   | 10,853 (23.8)  |
| 4                                                 | 24,319 (12.9)  | 3,911 (15.1)   | 5,740 (12.0)   | 2,566 (11.6)   | 4,954 (17.1)   | 1,773 (9.9)    | 5,375 (11.8)   |
| 5                                                 | 11,745 (6.2)   | 1,823 (7.0)    | 2,835 (5.9)    | 1,311 (5.9)    | 2,910 (10.1)   | 768 (4.3)      | 2,098 (4.6)    |
| 6+                                                | 7,693 (4.1)    | 1,108 (4.3)    | 1,839 (3.9)    | 825 (3.7)      | 2,443 (8.5)    | 474 (2.7)      | 1,004 (2.2)    |
| <b>Index Admission Characteristics</b>            |                |                |                |                |                |                |                |
| <b>Institution admitted from</b>                  |                |                |                |                |                |                |                |
| Community, no home care                           | 157,729 (83.7) | 22,348 (86.0)  | 41,036 (86.0)  | 13,847 (62.5)  | 21,188 (73.4)  | 16,286 (91.2)  | 43,024 (94.2)  |
| Community, home care                              | 793 (0.4)      | 70 (0.3)       | 227 (0.5)      | 174 (0.8)      | 190 (0.7)      | 56 (0.3)       | 76 (0.2)       |
| Long term care                                    | 20,326 (10.8)  | 1,330 (5.1)    | 3,806 (8.0)    | 7,102 (32.1)   | 6,118 (21.2)   | 602 (3.4)      | 1,368 (3.0)    |



|                                                              |                |                |                |                 |                 |                |                |
|--------------------------------------------------------------|----------------|----------------|----------------|-----------------|-----------------|----------------|----------------|
| Ambulatory care                                              | 9,166 (4.9)    | 2,214 (8.5)    | 2,582 (5.4)    | 923 (4.2)       | 1,345 (4.7)     | 903 (5.1)      | 1,199 (2.6)    |
| Unclassified                                                 | 340 (0.2)      | 33 (0.1)       | 86 (0.2)       | 101 (0.5)       | 83 (0.3)        | 20 (0.1)       | 17 (-)         |
| <b>Reason for admission<br/>(Most responsible diagnosis)</b> |                |                |                |                 |                 |                |                |
| Infection                                                    | 6,054 (3.2)    | 455 (1.8)      | 2,103 (4.4)    | 1,001 (4.5)     | 1,126 (3.9)     | 1,021 (5.7)    | 348 (0.8)      |
| Neoplasm                                                     | 14,031 (7.5)   | 667 (2.3)      | 3,669 (7.7)    | 1,102 (5.0)     | 874 (3.0)       | 1,970 (11.0)   | 5,749 (12.6)   |
| Endocrine                                                    | 4,984 (2.7)    | 488 (1.9)      | 1,871 (3.9)    | 614 (2.8)       | 1,125 (3.9)     | 287 (1.6)      | 599 (1.3)      |
| Mental Health                                                | 4,623 (2.5)    | 328 (1.3)      | 1,350 (2.8)    | 1,626 (7.3)     | 921 (3.2)       | 106 (0.6)      | 292 (0.6)      |
| Nervous System                                               | 3,292 (1.8)    | 637 (2.5)      | 993 (2.1)      | 741 (3.4)       | 513 (1.8)       | 58 (0.3)       | 350 (0.8)      |
| Eye                                                          | 141 (0.1)      | 28 (0.1)       | 49 (0.1)       | 14 (0.1)        | 13 (-)          | 21 (0.1)       | 16 (-)         |
| Ear                                                          | 448 (0.2)      | 66 (0.3)       | 189 (0.4)      | 44 (0.2)        | 70 (0.2)        | 32 (0.2)       | 47 (0.1)       |
| Circulatory                                                  | 37,963 (20.2)  | 15,403 (59.3)  | 7,335 (15.4)   | 1,943 (8.8)     | 8,762 (30.3)    | 516 (2.9)      | 4,004 (8.8)    |
| Respiratory                                                  | 23,255 (12.4)  | 1,189 (4.6)    | 9,156 (19.2)   | 3,469 (15.7)    | 4,305 (14.9)    | 4,347 (24.3)   | 789 (1.7)      |
| Digestive                                                    | 17,820 (9.5)   | 1,339 (5.2)    | 6,311 (13.2)   | 1,921 (8.7)     | 1,924 (6.7)     | 2,764 (15.5)   | 3,561 (7.8)    |
| Skin                                                         | 2,060 (1.1)    | 96 (0.4)       | 600 (1.3)      | 344 (1.6)       | 373 (1.3)       | 513 (2.9)      | 134 (0.3)      |
| Musculoskeletal                                              | 28,406 (15.1)  | 1,188 (4.6)    | 1,905 (4.0)    | 1,823 (8.2)     | 1,703 (5.9)     | 452 (2.5)      | 21,335 (46.7)  |
| Genitourinary                                                | 12,396 (6.6)   | 790 (3.0)      | 3,349 (7.0)    | 1,666 (7.5)     | 1,936 (6.7)     | 3,454 (19.3)   | 1,201 (2.6)    |
| Congenital                                                   | 106 (0.1)      | 24 (0.1)       | 19 (-)         | 9 (-)           | 11 (-)          | 7 (-)          | 36 (0.1)       |
| Injury                                                       | 15,414 (8.2)   | 1,126 (4.3)    | 2,911 (6.1)    | 3,279 (14.8)    | 2,471 (8.5)     | 850 (4.8)      | 4,777 (10.5)   |
| Health services                                              | 4,274 (2.3)    | 487 (1.9)      | 1,081 (2.3)    | 597 (2.7)       | 479 (1.7)       | 380 (2.1)      | 1,250 (2.7)    |
| Unspecified                                                  | 11,187 (5.9)   | 1,517 (5.8)    | 4,035 (8.6)    | 1,732 (7.8)     | 2,011 (7.0)     | 827 (4.6)      | 1,063 (2.3)    |
| <b>Total LOS, median (IQR)</b>                               | <b>4 (2-8)</b> | <b>4 (2-8)</b> | <b>4 (2-8)</b> | <b>6 (3-13)</b> | <b>6 (3-10)</b> | <b>3 (2-5)</b> | <b>3 (2-5)</b> |
| <b>Main Patient Service</b>                                  |                |                |                |                 |                 |                |                |
| General Practice                                             | 2,228 (1.2)    | -              | -              | 497 (2.2)       | 425 (1.5)       | 212 (1.2)      | -              |
| General Medicine                                             | 80,133 (42.5)  | 10,944 (42.1)  | 26,128 (54.7)  | 13,083 (59.1)   | 15,620 (54.0)   | 7,736 (43.3)   | 6,622 (14.5)   |
| Cardiology                                                   | 15,882 (8.4)   | 7,335 (28.2)   | 3,174 (6.7)    | 452 (2.0)       | 3,369 (11.7)    | -              | 1,386 (3.0)    |
| Gastro-Enterology                                            | 4,949 (2.6)    | 385 (1.5)      | 2,068 (4.3)    | 567 (2.6)       | 701 (2.4)       | 621 (3.5)      | 607 (1.3)      |
| Nephrology                                                   | 1,461 (0.8)    | -              | 554 (1.2)      | -               | 367 (1.3)       | -              | -              |
| Neurology                                                    | 2,877 (1.5)    | 985 (3.8)      | 662 (1.4)      | 353 (1.6)       | 553 (1.9)       | -              | -              |
| Respirology                                                  | 6,706 (3.6)    | 257 (1.4)      | 2,729 (5.7)    | 916 (4.1)       | 1,254 (4.3)     | 1,170 (6.6)    | -              |
| General Surgery                                              | 19,048 (10.1)  | 1,218 (4.7)    | 3,728 (7.8)    | 1,323 (6.0)     | 1,373 (4.8)     | 2,371 (13.3)   | -              |
| Cardio Surgery                                               | 5,878 (3.1)    | 2,017 (7.8)    | 771 (1.6)      | 244 (1.1)       | 1,374 (4.8)     | -              | 1,313 (2.9)    |
| Neurosurgery                                                 | 1,703 (0.9)    | -              | 534 (1.1)      | -               | -               | -              | 750 (1.6)      |
| Orthopaedic Surgery                                          | 27,229 (14.5)  | 1,267 (4.9)    | 1,552 (3.3)    | 2,282 (10.3)    | 1,862 (6.4)     | 452 (2.5)      | 19,814 (43.4)  |
| Thoracic Surgery                                             | 1,147 (0.6)    | -              | -              | -               | -               | -              | 687 (1.5)      |
| Traumatology                                                 | 1,992 (1.1)    | -              | -              | 458 (2.1)       | 228 (1.2)       | -              | 571 (1.3)      |
| Urology                                                      | 8,315 (4.4)    | 372 (1.4)      | 1,617 (3.4)    | 529 (2.4)       | 692 (2.4)       | -              | 1,737 (3.8)    |

|                                                                                |               |               |               |              |               |               |               |               |
|--------------------------------------------------------------------------------|---------------|---------------|---------------|--------------|---------------|---------------|---------------|---------------|
| Otolaryngology                                                                 | 1,603 (0.9)   | -             | -             | -            | -             | -             | 389 (2.2)     | 471 (1.0)     |
| Medical Oncology                                                               | 3,755 (2.0)   | -             | 1,188 (2.5)   | 353 (1.6)    | -             | -             | 504 (2.8)     | 1,344 (2.9)   |
| Other                                                                          | 5,440 (2.9)   | 396 (1.5)     | 1,632 (3.4)   | 1,068 (4.8)  | 833 (2.9)     | 833 (2.9)     | 449 (2.5)     | 1,062 (2.3)   |
| <b>Charlson Comorbidity Score, mean (SD)</b>                                   | 1.5 (1.6)     | 1.5 (1.6)     | 1.6 (2.0)     | 1.6 (1.9)    | 2.1 (1.7)     | 2.1 (1.7)     | 1.2 (1.7)     | 1.0 (1.8)     |
| <b>Discharge disposition</b>                                                   |               |               |               |              |               |               |               |               |
| Long term or continuing care                                                   | 25,297 (13.4) | 2,149 (8.3)   | 4,948 (10.4)  | 8,006 (36.2) | 7,260 (25.1)  | 332 (1.9)     | 332 (1.9)     | 2,602 (5.7)   |
| Home with support services                                                     | 72,943 (38.7) | 8,048 (31.0)  | 17,804 (37.3) | 9,599 (43.3) | 12,648 (43.7) | 5,623 (31.5)  | 5,623 (31.5)  | 19,331 (42.1) |
| Home, no support services                                                      | 90,114 (47.8) | 15,798 (60.8) | 24,985 (52.3) | 4,542 (20.5) | 9,016 (31.2)  | 11,912 (66.7) | 11,912 (66.7) | 23,861 (52.2) |
| <b>Distinct medications dispensed 30 days post discharge, median (IQR)</b>     | 3 (2-6)       | 4 (3-5)       | 2 (1-4)       | 7 (5-9)      | 9 (7-11)      | 2 (1-2)       | 2 (1-2)       | 2 (1-3)       |
| 1                                                                              | 39,264 (20.9) | 1,125 (4.3)   | 15,314 (32.1) | 0 (-)        | 0 (-)         | 7,912 (44.3)  | 7,912 (44.3)  | 14,913 (32.6) |
| 2                                                                              | 38,690 (20.5) | 5,115 (19.7)  | 10,991 (23.0) | 0 (-)        | 0 (-)         | 6,376 (35.7)  | 6,376 (35.7)  | 16,208 (35.5) |
| 3                                                                              | 26,461 (14.1) | 5,712 (22.0)  | 8,950 (18.8)  | 527 (2.4)    | 0 (-)         | 2,235 (12.5)  | 2,235 (12.5)  | 9,037 (19.8)  |
| 4                                                                              | 18,599 (9.9)  | 5,892 (22.7)  | 5,852 (12.3)  | 2,095 (9.5)  | 153 (0.5)     | 941 (5.3)     | 941 (5.3)     | 3,666 (8.0)   |
| 5                                                                              | 14,643 (7.8)  | 4,476 (17.2)  | 3,428 (7.2)   | 3,491 (15.8) | 1,586 (5.5)   | 297 (1.7)     | 297 (1.7)     | 1,365 (3.0)   |
| 6                                                                              | 11,781 (6.3)  | 2,375 (9.1)   | 1,782 (3.7)   | 3,760 (17.0) | 3,394 (11.7)  | 82 (0.5)      | 82 (0.5)      | 387 (0.9)     |
| 7                                                                              | 9,785 (5.2)   | 916 (3.5)     | 846 (1.8)     | 3,396 (15.3) | 4,522 (15.6)  | 22 (0.1)      | 22 (0.1)      | 83 (0.2)      |
| 8                                                                              | 7,997 (4.3)   | 289 (1.1)     | 342 (0.7)     | 2,751 (12.4) | 4,593 (15.9)  | 2 (-)         | 2 (-)         | 20 (-)        |
| 9                                                                              | 6,353 (3.6)   | 76 (0.3)      | 149 (0.3)     | 2,072 (9.4)  | 4,051 (14.0)  | 0 (-)         | 0 (-)         | 5 (-)         |
| 10+                                                                            | 14,781 (7.9)  | 19 (0.1)      | 82 (0.2)      | 4,055 (18.3) | 10,625 (36.7) | 0 (-)         | 0 (-)         | 0 (-)         |
| <b>New distinct medications dispensed 30 days post discharge, median (IQR)</b> | 1 (1-2)       | 2 (1-3)       | 1 (0-2)       | 2 (1-3)      | 2 (1-3)       | 1 (1-2)       | 1 (1-2)       | 2 (1-2)       |
| 0                                                                              | 38,512 (20.5) | 5,138 (19.8)  | 14,801 (31.0) | 4,648 (21.0) | 6,503 (22.5)  | 2,359 (13.2)  | 2,359 (13.2)  | 5,063 (11.1)  |
| 1                                                                              | 61,728 (32.8) | 5,848 (22.5)  | 17,589 (36.9) | 5,363 (24.2) | 6,592 (22.8)  | 8,969 (50.2)  | 8,969 (50.2)  | 17,367 (38.0) |
| 2                                                                              | 44,305 (23.5) | 6,097 (23.5)  | 8,708 (18.2)  | 4,546 (20.5) | 5,342 (18.5)  | 4,840 (27.1)  | 4,840 (27.1)  | 14,772 (32.3) |
| 3                                                                              | 22,571 (12.0) | 4,182 (16.1)  | 4,043 (8.5)   | 3,208 (14.5) | 3,814 (13.2)  | 1,247 (7.0)   | 1,247 (7.0)   | 6,077 (13.3)  |
| 4                                                                              | 11,157 (5.9)  | 2,659 (10.2)  | 1,669 (3.5)   | 2,001 (9.0)  | 2,582 (8.9)   | 363 (2.0)     | 363 (2.0)     | 1,883 (4.1)   |
| 5+                                                                             | 10,081 (5.4)  | 2,071 (8.0)   | 927 (1.9)     | 2,381 (10.8) | 4,091 (14.1)  | 89 (0.5)      | 89 (0.5)      | 522 (1.1)     |

**Table 2.** Prevalence of dispensed medication classes and most common ingredients in class

| <b>Dispensed Medication Classes</b>                                           | <b>N (%)<sup>1</sup></b> | <b>N new (%)</b> | <b>Most common medications in the class overall (%)<sup>2</sup></b>                                  |
|-------------------------------------------------------------------------------|--------------------------|------------------|------------------------------------------------------------------------------------------------------|
| <b>A02</b> Drugs for Acid Related Disorders                                   | 45,252 (24.0)            | 15,032 (8.0)     | pantoprazole (64%), rabeprazole (13%), lansoprazole (16%)                                            |
| <b>A03</b> Drugs for Functional Gastrointestinal Disorders                    | 3,869 (2.1)              | 1,457 (0.8)      | domperidone (83%)                                                                                    |
| <b>A06</b> Drugs for Constipation                                             | 31,048 (16.5)            | 20,737 (11.0)    | docusate sodium (48%), lactulose (46%)                                                               |
| <b>A07</b> Antidiarrheals, Intestinal Anti-inflammatory/Anti-infective Agents | 2,995 (1.6)              | 1,759 (0.9)      | loperamide (43%), mesalazine (19%), nystatin (23%)                                                   |
| <b>A10</b> Drugs Used in Diabetes                                             | 23,337 (12.4)            | 5,774 (3.1)      | gliclazide (16%), metformin (42%), sitagliptin (13%)                                                 |
| <b>B01</b> Antithrombotic Agents                                              | 56,203 (29.8)            | 37,591 (20.0)    | warfarin (30%), clopidogrel (29%), rivaroxaban (17%)                                                 |
| <b>B03</b> Antianemic Preparations                                            | 2,788 (1.5)              | 815 (0.4)        | folic acid (93%)                                                                                     |
| <b>C01</b> Cardiac Therapy                                                    | 18,874 (10.0)            | 10,655 (5.7)     | Nitroglycerin, oral and patch (32%), digoxin (48%), amiodarone (12%)                                 |
| <b>C02</b> Antihypertensives                                                  | 2,893 (1.5)              | 1,230 (0.7)      | hydralazine (55%), doxazosin (26%), clonidine (12%)                                                  |
| <b>C03</b> Diuretics                                                          | 36,355 (19.3)            | 11,802 (6.3)     | furosemide (78%), hydrochlorothiazide (8%)                                                           |
| <b>C07</b> Beta Blocking Agents                                               | 41,797 (22.2)            | 14,722 (7.8)     | metoprolol (49%), bisoprolol (36%)                                                                   |
| <b>C08</b> Calcium Channel Blockers                                           | 29,850 (15.9)            | 9,258 (4.9)      | amlodipine (75%), diltiazem (18%)                                                                    |
| <b>C09</b> Agents Acting on Renin-Angiotensin System                          | 40,975 (21.8)            | 11,487 (6.1)     | rampiril (32%), perindopril (28%), candesartan (7%)                                                  |
| <b>C10</b> Cholesterol Lowering Agents                                        | 47,317 (25.1)            | 9,882 (5.3)      | atorvastatin (53%), rosuvastatin (32%)                                                               |
| <b>D01</b> Antifungals for Dermatological Use                                 | 3,425 (1.8)              | 1,989 (1.1)      | clotrimazole, topical (83%)                                                                          |
| <b>D07</b> Corticosteroids, Dermatological Preparations                       | 2,234 (1.2)              | 736 (0.4)        | Betamethasone, topical (63%), mometasone, topical (11%)                                              |
| <b>G04</b> Urologicals                                                        | 16,102 (8.6)             | 4,020 (2.1)      | tamsulosin (41%), dutasteride (13%), finasteride (11%)                                               |
| <b>H02</b> Corticosteroids for Systemic Use                                   | 13,729 (7.3)             | 6,211 (3.3)      | prednisone (84%), fludocortisone (7%), dexamethasone (6%)                                            |
| <b>H03</b> Thyroid Therapy                                                    | 17,747 (9.4)             | 1,022 (0.5)      | levothyroxine (99%)                                                                                  |
| <b>J01</b> Antibacterials for Systemic Use                                    | 43,107 (22.9)            | 34,355 (18.2)    | ciprofloxacin (15%), cefalexin (14%), amoxicillin & beta-lactamase inhibitor (14%), cefuroxime (11%) |
| <b>J05</b> Antivirals for Systemic Use                                        | 1,808 (1.0)              | 1,319 (0.7)      | oseltamivir (82%), valaciclovir (5%), valaciclovir (5%)                                              |
| <b>M01</b> Anti-inflammatory Products                                         | 5,580 (3.0)              | 3,185 (1.7)      | celecoxib (38%), meloxicam (21%), naproxen (16%), ibuprofen (14%)                                    |
| <b>M04</b> Antigout Preparations                                              | 5,057 (2.7)              | 501 (0.3)        | allopurinol (99%)                                                                                    |
| <b>M05</b> Drugs for Treatment of Bone Diseases                               | 7,867 (4.2)              | 1,248 (0.7)      | risedronic acid (74%), alendronic acid & cholecalciferol (12%)                                       |
| <b>N02</b> Analgesics                                                         | 75,579 (40.1)            | 53,572 (28.4)    | hydromorphone (50%), oxycodone (29%), codeine & paracetamol (8%)                                     |
| <b>N03</b> Antiepileptics                                                     | 17,386 (9.2)             | 4,839 (2.6)      | gabapentin (28%), pregabalin (22%), phenytoin (16%)                                                  |
| <b>N04</b> Anti-Parkinson Drugs                                               | 3,886 (2.1)              | 411 (0.2)        | levodopa & decarboxylase inhibitor (69%), pramipexole (10%)                                          |

|                                                  |               |              |                                                                            |
|--------------------------------------------------|---------------|--------------|----------------------------------------------------------------------------|
| <b>N05</b> Psycholeptics                         | 18,879 (10.0) | 6,559 (3.5)  | quetiapine (31%), risperidone (19%), lorazepam (15%)                       |
| <b>N06</b> Psychoanaleptics                      | 32,555 (17.3) | 6,288 (3.3)  | trazodone (25%), escitalopram (14%), mirtazapine (11%), donepezil (11%)    |
| <b>P01</b> Antiprotozoals                        | 4,513 (2.4)   | 3,723 (2.0)  | metronidazole (80%), hydroxychloroquine (20%)                              |
| <b>R03</b> Drugs for Obstructive Airway Diseases | 24,520 (13.0) | 11,549 (6.1) | salbutamol (41%), tiotropium bromide (16%), salmeterol & fluticasone (13%) |
| <b>S01</b> Ophthalmologicals                     | 5,894 (3.1)   | 1,272 (0.7)  | latanoprost (21%), timolol, combinations (11%)                             |

<sup>1</sup> % is of all patients

<sup>2</sup> % is of all medications dispensed in that class

**Table 3.** Association Between Patient Characteristics and Risk of Adverse Drug Events in 30-days Following Discharge

| Patient Characteristics                          | Crude Risk of ADE (%) | Adjusted OR ADE (%) | Lower 95% CI for adjusted OR | Upper 95% CI for adjusted OR |
|--------------------------------------------------|-----------------------|---------------------|------------------------------|------------------------------|
| <b>Demographics</b>                              |                       |                     |                              |                              |
| <b>Age</b>                                       |                       |                     |                              |                              |
| 66-75                                            | 5.7                   |                     | <i>Reference</i>             |                              |
| 76-85                                            | 7.3                   | 1.13                | 1.09                         | 1.19                         |
| 85+                                              | 8.0                   | 1.19                | 1.13                         | 1.26                         |
| <b>Sex</b>                                       |                       |                     |                              |                              |
| Male                                             | 6.7                   |                     | <i>Reference</i>             |                              |
| Female                                           | 6.8                   | 1.02                | 0.99                         | 1.06                         |
| <b>Health services 1-year prior to admission</b> |                       |                     |                              |                              |
| <b>Hospitalizations</b>                          |                       |                     |                              |                              |
| 0                                                | 6.2                   |                     | <i>Reference</i>             |                              |
| 1                                                | 7.9                   | 1.00                | 0.94                         | 1.06                         |
| 2                                                | 10.3                  | 1.08                | 0.99                         | 1.18                         |
| 3                                                | 12.7                  | 1.22                | 1.07                         | 1.39                         |
| 4+                                               | 14.1                  | 1.24                | 1.07                         | 1.44                         |
| <b>Emergency department visits</b>               |                       |                     |                              |                              |
| 0                                                | 3.0                   |                     | <i>Reference</i>             |                              |
| 1                                                | 5.7                   | 1.19                | 1.07                         | 1.32                         |
| 2                                                | 6.5                   | 1.29                | 1.16                         | 1.44                         |
| 3                                                | 7.9                   | 1.49                | 1.33                         | 1.67                         |
| 4                                                | 8.1                   | 1.45                | 1.28                         | 1.63                         |
| 5                                                | 8.4                   | 1.44                | 1.26                         | 1.64                         |
| 6+                                               | 10.6                  | 1.69                | 1.50                         | 1.90                         |
| <b>Distinct medications dispensed</b>            |                       |                     |                              |                              |
| 0                                                | 4.7                   |                     | <i>Reference</i>             |                              |
| 1-3                                              | 4.6                   | 1.02                | 0.87                         | 1.21                         |
| 4-6                                              | 5.1                   | 1.08                | 0.92                         | 1.26                         |
| 7-9                                              | 6.0                   | 1.15                | 0.98                         | 1.35                         |
| 10-12                                            | 7.0                   | 1.26                | 1.07                         | 1.48                         |
| 13-15                                            | 8.1                   | 1.37                | 1.16                         | 1.61                         |
| 16+                                              | 10.2                  | 1.55                | 1.31                         | 1.83                         |
| <b>Chronic Conditions</b>                        |                       |                     |                              |                              |
| Acute myocardial infarction                      | 8.7                   | 1.03                | 0.95                         | 1.12                         |
| Arrhythmia                                       | 8.6                   | 1.10                | 1.05                         | 1.16                         |
| Heart failure                                    | 11.6                  | 1.21                | 1.15                         | 1.27                         |
| Coronary artery syndrome                         | 7.4                   | 0.96                | 0.91                         | 1.01                         |
| Hypertension                                     | 6.7                   | 1.03                | 0.99                         | 1.07                         |

|                                        |      |      |                  |      |
|----------------------------------------|------|------|------------------|------|
| Stroke                                 | 7.2  | 0.92 | 0.94             | 0.99 |
| Cancer                                 | 6.9  | 0.96 | 0.92             | 1.00 |
| Diabetes                               | 7.6  | 0.97 | 0.92             | 1.01 |
| Chronic obstructive pulmonary disease  | 7.9  | 0.99 | 0.94             | 1.05 |
| Asthma                                 | 7.5  | 1.01 | 0.93             | 1.09 |
| Dementia                               | 7.8  | 1.01 | 0.95             | 1.07 |
| Mental health disorders                | 7.2  | 0.99 | 0.92             | 1.05 |
| Mood and anxiety disorders             | 7.4  | 1.02 | 0.98             | 1.08 |
| Osteoporosis                           | 6.4  | 0.98 | 0.89             | 1.08 |
| Osteoarthritis                         | 5.3  | 0.99 | 0.94             | 1.05 |
| Arthritis                              | 6.2  | 0.97 | 0.92             | 1.02 |
| Rheumatoid arthritis                   | 6.7  | 1.00 | 0.90             | 1.12 |
| Renal disease                          | 11.6 | 1.42 | 1.34             | 1.50 |
| Liver disease                          | 12.6 | 1.54 | 1.34             | 1.77 |
| <b>Index admission characteristics</b> |      |      |                  |      |
| <b>Institution admitted from</b>       |      |      |                  |      |
| Community, no home care                | 6.5  |      | <i>Reference</i> |      |
| Community, home care                   | 7.9  | 0.91 | 0.70             | 1.18 |
| Long term care                         | 8.3  | 1.09 | 1.03             | 1.17 |
| Ambulatory care                        | 7.7  | 1.09 | 1.01             | 1.19 |
| Unclassified                           | 7.7  | 1.13 | 0.76             | 1.70 |
| <b>Acuity</b>                          |      |      |                  |      |
| Not admitted from ED                   | 4.2  |      | <i>Reference</i> |      |
| Admitted from the ED                   | 7.7  | 1.23 | 1.14             | 1.33 |
| <b>Main Patient Service</b>            |      |      |                  |      |
| General Medicine                       | 8.1  |      | <i>Reference</i> |      |
| General Practice                       | 6.5  | 0.81 | 0.68             | 0.97 |
| Cardiology                             | 8.2  | 0.95 | 0.88             | 1.02 |
| Gastro-Enterology                      | 8.6  | 1.02 | 0.91             | 1.15 |
| Nephrology                             | 10.9 | 0.93 | 0.78             | 1.11 |
| Neurology                              | 6.5  | 0.91 | 0.77             | 1.07 |
| Respirology                            | 7.7  | 1.02 | 0.92             | 1.13 |
| General Surgery                        | 4.2  | 0.68 | 0.62             | 0.74 |
| Cardio Surgery                         | 6.9  | 1.06 | 0.94             | 1.20 |
| Neurosurgery                           | 5.2  | 0.98 | 0.78             | 1.23 |
| Orthopaedic Surgery                    | 3.6  | 0.84 | 0.75             | 0.94 |
| Thoracic Surgery                       | 6.0  | 0.89 | 0.69             | 1.15 |
| Urology                                | 4.2  | 0.60 | 0.53             | 0.68 |
| Otolaryngology                         | 3.9  | 0.64 | 0.49             | 0.83 |
| Medical Oncology                       | 8.7  | 0.95 | 0.83             | 1.09 |
| Other                                  | 6.7  | 0.99 | 0.88             | 1.11 |
| <b>Reason for Admission*</b>           |      |      |                  |      |
| Circulatory                            | 8.4  |      | <i>Reference</i> |      |
| Infection                              | 6.8  | 1.00 | 0.90             | 1.11 |
| Neoplasm                               | 8.4  | 1.08 | 0.97             | 1.20 |
| Endocrine                              | 7.5  | 0.95 | 0.85             | 1.07 |

|                                        |     |      |                  |      |
|----------------------------------------|-----|------|------------------|------|
| Mental Health                          | 7.5 | 0.87 | 0.77             | 0.99 |
| Nervous System                         | 5.8 | 0.78 | 0.67             | 0.91 |
| Eye                                    | 4.3 | 0.65 | 0.29             | 1.48 |
| Ear                                    | 5.4 | 0.81 | 0.53             | 1.24 |
| Respiratory                            | 7.2 | 0.76 | 0.70             | 0.83 |
| Digestive                              | 6.9 | 0.98 | 0.90             | 1.07 |
| Skin                                   | 8.3 | 0.91 | 0.77             | 1.08 |
| Musculoskeletal                        | 3.8 | 0.86 | 0.77             | 0.96 |
| Genitourinary                          | 7.5 | 1.04 | 0.95             | 1.15 |
| Congenital                             | 3.8 | 0.68 | 0.25             | 1.84 |
| Injury                                 | 4.5 | 0.64 | 0.58             | 0.71 |
| Health services                        | 4.9 | 0.65 | 0.56             | 0.75 |
| Unspecified                            | 7.2 | 0.93 | 0.86             | 1.01 |
| <b>Total length of stay</b>            | -   | 1.01 | 1.01             | 1.02 |
| <b>Charlson Comorbidity Score</b>      | -   | 1.05 | 1.04             | 1.06 |
| <b>Post-discharge medications</b>      |     |      |                  |      |
| <b>New Medications</b>                 |     |      |                  |      |
| 0                                      | 6.7 |      | <i>Reference</i> |      |
| 1                                      | 6.7 | 1.14 | 1.08             | 1.21 |
| 2                                      | 6.2 | 1.16 | 1.09             | 1.22 |
| 3                                      | 6.8 | 1.23 | 1.15             | 1.32 |
| 4                                      | 7.5 | 1.31 | 1.20             | 1.42 |
| 5+                                     | 8.4 | 1.39 | 1.27             | 1.52 |
| <b>Medication Cluster <sup>1</sup></b> |     |      |                  |      |
| Cardiovascular                         | 7.0 | 0.97 | 0.92             | 1.03 |
| Respiratory                            | 7.7 | 1.12 | 1.08             | 1.17 |
| Complex care needs                     | 6.6 | 0.82 | 0.77             | 0.87 |
| Cardiovascular and metabolic           | 8.9 | 0.98 | 0.94             | 1.03 |
| Infection                              | 6.0 | 1.01 | 0.94             | 1.08 |
| Surgical                               | 4.6 | 1.02 | 0.97             | 1.08 |

<sup>1</sup> Reference is all other clusters (e.g., cardiovascular vs not)

**Table A1.** List of medication classes excluded from analysis

| <b>3 Digit ATC code</b> | <b>Class Name</b>                                                |
|-------------------------|------------------------------------------------------------------|
| A01                     | STOMATOLOGICAL PREPARATIONS                                      |
| A05                     | BILE AND LIVER THERAPY                                           |
| A09                     | DIGESTIVES, INCL. ENZYMES                                        |
| A11                     | VITAMINS                                                         |
| A16                     | OTHER ALIMENTARY TRACT AND METABOLISM PRODUCTS                   |
| B02                     | ANTHEMORRHAGICS                                                  |
| B05                     | BLOOD SUBSTITUTES AND PERFUSION SOLUTIONS                        |
| C04                     | PERIPHERAL VASODILATORS                                          |
| C05                     | VASOPROTECTIVES                                                  |
| D03                     | PREPARATIONS FOR TREATMENT OF WOUNDS AND ULCERS                  |
| D05                     | ANTIPSORIATICS                                                   |
| D06                     | ANTIBIOTICS AND CHEMOTHERAPEUTICS FOR DERMATOLOGICAL USE         |
| D10                     | ANTI-ACNE PREPARATIONS                                           |
| D11                     | OTHER DERMATOLOGICAL PREPARATIONS                                |
| G01                     | GYNECOLOGICAL ANTIINFECTIVES AND ANTISEPTICS                     |
| G02                     | OTHER GYNECOLOGICALS                                             |
| G03                     | SEX HORMONES AND MODULATORS OF THE GENITAL SYSTEM                |
| H01                     | PITUITARY AND HYPOTHALAMIC HORMONES AND ANALOGUES                |
| H04                     | PANCREATIC HORMONES                                              |
| H05                     | CALCIUM HOMEOSTASIS                                              |
| J02                     | ANTIMYCOTICS FOR SYSTEMIC USE                                    |
| J04                     | ANTIMYCOBACTERIALS                                               |
| J07                     | VACCINES                                                         |
| L01                     | ANTINEOPLASTIC AGENTS                                            |
| L02                     | ENDOCRINE THERAPY                                                |
| L03                     | IMMUNOSTIMULANTS                                                 |
| L04                     | IMMUNOSUPPRESSANTS                                               |
| M03                     | MUSCLE RELAXANTS                                                 |
| N07                     | OTHER NERVOUS SYSTEM DRUGS                                       |
| P02                     | ANTHELMINTICS                                                    |
| P03                     | ECTOPARASITICIDES, INCL. SCABICIDES, INSECTICIDES AND REPELLENTS |
| R01                     | NASAL PREPARATIONS                                               |
| R05                     | COUGH AND COLD PREPARATIONS                                      |
| R06                     | ANTIHISTAMINES FOR SYSTEMIC USE                                  |
| R07                     | OTHER RESPIRATORY SYSTEM PRODUCTS                                |
| S02                     | OTOLOGICALS                                                      |



|     |                                              |
|-----|----------------------------------------------|
| S03 | OPHTHALMOLOGICAL AND OTOLOGICAL PREPARATIONS |
| V03 | ALL OTHER THERAPEUTIC PRODUCTS               |
| V07 | ALL OTHER NON-THERAPEUTIC PRODUCTS           |

**Table A2.** IC9 and ICD 10 codes used to define pre-admission chronic conditions

| Condition                                                                                                                                                                                                                       | ICD 9                                                                                               | ICD 10                                                                                                                                                                                                                                                                                                                                                                                                                                                                                                                                |
|---------------------------------------------------------------------------------------------------------------------------------------------------------------------------------------------------------------------------------|-----------------------------------------------------------------------------------------------------|---------------------------------------------------------------------------------------------------------------------------------------------------------------------------------------------------------------------------------------------------------------------------------------------------------------------------------------------------------------------------------------------------------------------------------------------------------------------------------------------------------------------------------------|
| <b>Acute Myocardial Infarction (AMI)</b>                                                                                                                                                                                        | 410                                                                                                 | I21, I22                                                                                                                                                                                                                                                                                                                                                                                                                                                                                                                              |
| <b>Osteo- and other Arthritis:</b>                                                                                                                                                                                              |                                                                                                     |                                                                                                                                                                                                                                                                                                                                                                                                                                                                                                                                       |
| <b>(A) Osteoarthritis</b>                                                                                                                                                                                                       | 715                                                                                                 | M15-M19                                                                                                                                                                                                                                                                                                                                                                                                                                                                                                                               |
| <b>(B) Other Arthritis (includes Synovitis, Fibrositis, Connective tissue disorders, Ankylosing spondylitis, Gout Traumatic arthritis, pyogenic arthritis, Joint derangement, Dupuytren's contracture, Other MSK disorders)</b> | 727, 729, 710, 720, 274, 716, 711, 718, 728, 739                                                    | M00-M03, M07, M10, M11-M14, M20-M25, M30-M36, M65-M79                                                                                                                                                                                                                                                                                                                                                                                                                                                                                 |
| <b>Arthritis - Rheumatoid arthritis</b>                                                                                                                                                                                         | 714                                                                                                 | M05-M06                                                                                                                                                                                                                                                                                                                                                                                                                                                                                                                               |
| <b>Asthma</b>                                                                                                                                                                                                                   | 493                                                                                                 | J45                                                                                                                                                                                                                                                                                                                                                                                                                                                                                                                                   |
| <b>(all) Cancers</b>                                                                                                                                                                                                            | 140-239                                                                                             | C00-C26, C30-C44, C45-C97                                                                                                                                                                                                                                                                                                                                                                                                                                                                                                             |
| <b>Cardiac Arrhythmia</b>                                                                                                                                                                                                       | 427 (OHIP) / 427.3 (DAD)                                                                            | I48.0, I48.1                                                                                                                                                                                                                                                                                                                                                                                                                                                                                                                          |
| <b>Congestive Heart Failure</b>                                                                                                                                                                                                 | 428                                                                                                 | I500, I501, I509                                                                                                                                                                                                                                                                                                                                                                                                                                                                                                                      |
| <b>Chronic Obstructive Pulmonary Disease</b>                                                                                                                                                                                    | 491, 492, 496                                                                                       | J41, J43, J44                                                                                                                                                                                                                                                                                                                                                                                                                                                                                                                         |
| <b>Coronary syndrome (excluding AMI)</b>                                                                                                                                                                                        | 411-414                                                                                             | I20, I22-I25                                                                                                                                                                                                                                                                                                                                                                                                                                                                                                                          |
| <b>Dementia</b>                                                                                                                                                                                                                 | 290, 331 (OHIP) / 046.1, 290.0, 290.1, 290.2, 290.3, 290.4, 294, 331.0, 331.1, 331.5, F331.82 (DAD) | F00, F01, F02, F03, G30                                                                                                                                                                                                                                                                                                                                                                                                                                                                                                               |
| <b>Diabetes</b>                                                                                                                                                                                                                 | 250                                                                                                 | E08 - E13                                                                                                                                                                                                                                                                                                                                                                                                                                                                                                                             |
| <b>Hypertension</b>                                                                                                                                                                                                             | 401, 402, 403, 404, 405                                                                             | I10, I11, I12, I13, I15                                                                                                                                                                                                                                                                                                                                                                                                                                                                                                               |
| <b>(Other) Mental Illnesses</b>                                                                                                                                                                                                 | 291, 292, 295, 297, 298, 299, 301, 302, 303, 304, 305, 306, 307, 313, 314, 315, 319                 | F04, F050, F058, F059, F060, F061, F062, F063, F064, F07, F08, F10, F11, F12, F13, F14, F15, F16, F17, F18, F19, F20, F21, F22, F23, F24, F25, F26, F27, F28, F29, F340, F35, F36, F37, F430, F439, F453, F454, F458, F46, F47, F49, F50, F51, F52, F531, F538, F539, F54, F55, F56, F57, F58, F59, F60, F61, F62, F63, F64, F65, F66, F67, F681, F688, F69, F70, F71, F72, F73, F74, F75, F76, F77, F78, F79, F80, F81, F82, F83, F84, F85, F86, F87, F88, F89, F90, F91, F92, F931, F932, F933, F938, F939, F94, F95, F96, F97, F98 |
| <b>Mood, anxiety, depression and other nonpsychotic disorders</b>                                                                                                                                                               | 296, 300, 309, 311                                                                                  | F30, F31, F32, F33, F34 (excl. F34.0), F38, F39, F40, F41, F42, F43.1, F43.2, F43.8, F44, F45.0, F45.1, F45.2, F48, F53.0, F68.0, F93.0, F99                                                                                                                                                                                                                                                                                                                                                                                          |
| <b>Osteoporosis</b>                                                                                                                                                                                                             | 733                                                                                                 | M81, M82                                                                                                                                                                                                                                                                                                                                                                                                                                                                                                                              |
| <b>Renal failure</b>                                                                                                                                                                                                            | 403, 404, 584, 585, 586, v451                                                                       | N17, N18, N19, T82.4, Z49.2, Z99.2                                                                                                                                                                                                                                                                                                                                                                                                                                                                                                    |

**Stroke (excluding transient ischemic attack)**      430, 431, 432, 434, 436      I60-I64

---

**Table A3.** ICD 10 codes used to define adverse drug events (ADEs)

| <b>Code</b> | <b>Meaning</b>                                                                                                                                                       |
|-------------|----------------------------------------------------------------------------------------------------------------------------------------------------------------------|
| D52.1       | Drug-induced folate deficiency anaemia                                                                                                                               |
| D59.0       | Drug-induced autoimmune haemolytic anaemia                                                                                                                           |
| D59.2       | Drug-induced nonautoimmune haemolytic anaemia                                                                                                                        |
| D61.1       | Drug-induced aplastic anaemia due to chemotherapy                                                                                                                    |
| D68.3       | Hemorrhagic disorder due to circulating anticoagulants                                                                                                               |
| E06.4       | Drug-induced thyroiditis                                                                                                                                             |
| E16.0       | Drug-induced hypoglycaemia without coma                                                                                                                              |
| E23.1       | Drug-induced hypopituitarism                                                                                                                                         |
| E24.2       | Drug-induced Cushing's syndrome                                                                                                                                      |
| E27.3       | Drug-induced adrenocortical insufficiency                                                                                                                            |
| E66.1       | Drug-induced obesity                                                                                                                                                 |
| G21.0       | Malignant neuroleptic syndrome                                                                                                                                       |
| G21.1       | Other drug-induced secondary parkinsonism                                                                                                                            |
| G24.0       | Drug-induced dystonia                                                                                                                                                |
| G25.1       | Drug-induced tremor                                                                                                                                                  |
| G25.4       | Drug-induced chorea                                                                                                                                                  |
| G25.6       | Drug-induced tics and other tics of organic origin                                                                                                                   |
| G44.4       | Drug-induced headache, not elsewhere classified                                                                                                                      |
| G62.0       | Drug-induced polyneuropathy                                                                                                                                          |
| G72.0       | Drug-induced myopathy                                                                                                                                                |
| H26.3       | Drug-induced cataract                                                                                                                                                |
| H40.6       | Glaucoma secondary to drugs                                                                                                                                          |
| I95.2       | Hypotension due to drugs                                                                                                                                             |
| J70.2       | Acute drug-induced interstitial lung disorders                                                                                                                       |
| J70.3       | Chronic drug-induced interstitial lung disorders                                                                                                                     |
| J70.4       | Drug-induced interstitial lung disorders, unspecified                                                                                                                |
| K85.3       | Drug-induced pancreatitis                                                                                                                                            |
| L10.5       | Drug-induced pemphigus                                                                                                                                               |
| L43.2       | Lichenoid drug reaction                                                                                                                                              |
| L56.0       | Drug phototoxic response                                                                                                                                             |
| L56.1       | Drug photoallergic response                                                                                                                                          |
| L64.0       | Drug-induced androgenic alopecia                                                                                                                                     |
| M10.2       | Drug-induced gout                                                                                                                                                    |
| M32.0       | Drug-induced systemic lupus erythematosus                                                                                                                            |
| M80.4       | Drug-induced osteoporosis with pathological fracture                                                                                                                 |
| M81.4       | Drug-induced osteoporosis without pathological fracture                                                                                                              |
| M83.5       | Other drug-induced osteomalacia in adults                                                                                                                            |
| M87.1       | Osteonecrosis due to drugs                                                                                                                                           |
| N14.0       | Analgesic nephropathy                                                                                                                                                |
| O74.4       | Toxic reaction to local anaesthesia during labour and delivery<br>Fetus and newborn affected by maternal anaesthesia and analgesia in pregnancy, labour and delivery |
| P04.0       | Fetus and newborn affected by other maternal medication                                                                                                              |
| P04.1       | Fetus and newborn affected by other maternal medication                                                                                                              |
| P96.2       | Withdrawal symptoms from therapeutic use of drugs in newborn                                                                                                         |
| Q86.1       | Fetal hydantoin syndrome                                                                                                                                             |

|         |                                                                                                                                                                                                               |
|---------|---------------------------------------------------------------------------------------------------------------------------------------------------------------------------------------------------------------|
| Q86.2   | Dysmorphism due to warfarin                                                                                                                                                                                   |
| R50.2   | Drug-induced fever                                                                                                                                                                                            |
| T88.3   | Malignant hyperthermia due to anaesthesia                                                                                                                                                                     |
| Y40-Y59 | Adverse Drug reactions                                                                                                                                                                                        |
| Y40     | Drugs, medicaments, and biological substances causing adverse effects in therapeutic use - systemic antibiotic                                                                                                |
| Y41     | Drugs, medicaments, and biological substances causing adverse effects in therapeutic use - other systemic anti-infectives and antiparasitics                                                                  |
| Y42     | Drugs, medicaments, and biological substances causing adverse effects in therapeutic use - Hormones and their synthetic substitutes and antagonists, not elsewhere classified                                 |
| Y42.7   | Drugs, medicaments and biological substances causing adverse effects in therapeutic use - Hormones and their synthetic substitutes and antagonists, not elsewhere classified, Androgens and anabolic congener |
| Y43     | Drugs, medicaments and biological substances causing adverse effects in therapeutic use - Primarily systemic agents                                                                                           |
| Y44     | Drugs, medicaments and biological substances causing adverse effects in therapeutic use - Agents primarily affecting blood constituents                                                                       |
| Y44.0   | Drugs, medicaments and biological substances causing adverse effects in therapeutic use - Agents primarily affecting blood constituents, Iron preparations and other anti-hypochromic-anaemia preparations    |
| Y44.2   | Drugs, medicaments and biological substances causing adverse effects in therapeutic use - Agents primarily affecting blood constituents, Anticoagulants                                                       |
| Y45     | Drugs, medicaments and biological substances causing adverse effects in therapeutic use - Analgesics, antipyretics and anti-inflammatory drugs                                                                |
| Y45.5   | Drugs, medicaments and biological substances causing adverse effects in therapeutic use - Analgesics, antipyretics and anti-inflammatory drugs, 4-Aminophenol derivatives                                     |
| Y46     | Drugs, medicaments and biological substances causing adverse effects in therapeutic use - Antiepileptics and antiparkinsonism drugs                                                                           |
| Y47     | Drugs, medicaments and biological substances causing adverse effects in therapeutic use - Sedatives, hypnotics and antianxiety drugs                                                                          |
| Y47.1   | Drugs, medicaments and biological substances causing adverse effects in therapeutic use - Sedatives, hypnotics and antianxiety drugs, Benzodiazepines                                                         |
| Y48     | Drugs, medicaments and biological substances causing adverse effects in therapeutic use - Anaesthetics and therapeutic gases                                                                                  |
| Y48.1   | Drugs, medicaments and biological substances causing adverse effects in therapeutic use - Anaesthetics and therapeutic gases, Parenteral anaesthetics                                                         |
| Y48.2   | Drugs, medicaments and biological substances causing adverse effects in therapeutic use - Anaesthetics and therapeutic gases, Other and unspecified general anaesthetics                                      |
| Y48.3   | Drugs, medicaments and biological substances causing adverse effects in therapeutic use - Anaesthetics and therapeutic gases, Local anaesthetics                                                              |
| Y48.4   | Drugs, medicaments and biological substances causing adverse effects in therapeutic use - Anaesthetics and therapeutic gases, Anaesthetic, unspecified                                                        |
| Y49     | Drugs, medicaments and biological substances causing adverse effects in therapeutic use - Psychotropic drugs, not elsewhere classified                                                                        |
| Y50     | Drugs, medicaments and biological substances causing adverse effects in therapeutic use - Central nervous system stimulants, not elsewhere classified                                                         |
| Y51     | Drugs, medicaments and biological substances causing adverse effects in therapeutic use - Drugs primarily affecting the autonomic nervous system                                                              |
| Y52     | Drugs, medicaments and biological substances causing adverse effects in therapeutic use - Agents primarily affecting the cardiovascular system                                                                |
| Y53     | Drugs, medicaments and biological substances causing adverse effects in therapeutic use - Agents primarily affecting the gastrointestinal system                                                              |
| Y54     | Drugs, medicaments and biological substances causing adverse effects in therapeutic use - Agents primarily affecting water-balance and mineral and uric acid metabolism                                       |

|       |                                                                                                                                                                                                                                        |
|-------|----------------------------------------------------------------------------------------------------------------------------------------------------------------------------------------------------------------------------------------|
| Y55   | Drugs, medicaments and biological substances causing adverse effects in therapeutic use - Agents primarily acting on smooth and skeletal muscles and the respiratory system                                                            |
| Y55.1 | Drugs, medicaments and biological substances causing adverse effects in therapeutic use - Agents primarily acting on smooth and skeletal muscles and the respiratory system, Skeletal muscle relaxants [neuromuscular blocking agents] |
| Y56   | Drugs, medicaments and biological substances causing adverse effects in therapeutic use - Topical agents primarily affecting skin and mucous membrane and ophthalmological, otorhinolaryngological and dental drugs                    |
| Y57   | Drugs, medicaments and biological substances causing adverse effects in therapeutic use -Other and unspecified drugs and medicaments                                                                                                   |
| Y57.5 | Drugs, medicaments and biological substances causing adverse effects in therapeutic use -Other and unspecified drugs and medicaments, X-ray contrast media                                                                             |
| Y58   | Drugs, medicaments and biological substances causing adverse effects in therapeutic use - Bacterial vaccines                                                                                                                           |
| Y59   | Drugs, medicaments and biological substances causing adverse effects in therapeutic use - Other and unspecified vaccines and biological substances                                                                                     |
| Y88.0 | Sequelae of adverse effects caused by drugs, medicaments and biological substances in therapeutic use                                                                                                                                  |
| D64.2 | Secondary sideroblastic anaemia due to drugs and toxins                                                                                                                                                                                |
| E03.2 | Hypothyroidism due to medicaments and other exogenous substances                                                                                                                                                                       |
| F11   | Mental and behavioural disorders due to use of opioids                                                                                                                                                                                 |
| F11.0 | Mental and behavioural disorders due to use of opioids: Acute intoxication                                                                                                                                                             |
| F11.1 | Mental and behavioural disorders due to use of opioids: Harmful use                                                                                                                                                                    |
| F11.2 | Mental and behavioural disorders due to use of opioids: Dependence syndrome                                                                                                                                                            |
| F11.3 | Mental and behavioural disorders due to use of opioids: Withdrawal state                                                                                                                                                               |
| F11.4 | Mental and behavioural disorders due to use of opioids: Withdrawal state with delirium                                                                                                                                                 |
| F11.5 | Mental and behavioural disorders due to use of opioids: Psychotic disorder                                                                                                                                                             |
| F11.6 | Mental and behavioural disorders due to use of opioids: Amnesic syndrome                                                                                                                                                               |
| F11.7 | Mental and behavioural disorders due to use of opioids: Residual and late-onset psychotic disorder                                                                                                                                     |
| F11.8 | Mental and behavioural disorders due to use of opioids: Other mental and behavioural disorders                                                                                                                                         |
| F11.9 | Mental and behavioural disorders due to use of opioids: Unspecified mental and behavioural disorder                                                                                                                                    |
| F13   | Mental and behavioural disorders due to use of sedatives or hypnotics                                                                                                                                                                  |
| F13.0 | Mental and behavioural disorders due to use of sedatives or hypnotics: Acute intoxication                                                                                                                                              |
| F13.1 | Mental and behavioural disorders due to use of sedatives or hypnotics: Harmful use                                                                                                                                                     |
| F13.2 | Mental and behavioural disorders due to use of sedatives or hypnotics: Dependence syndrome                                                                                                                                             |
| F13.3 | Mental and behavioural disorders due to use of sedatives or hypnotics: Withdrawal state                                                                                                                                                |
| F13.4 | Mental and behavioural disorders due to use of sedatives or hypnotics: Withdrawal state with delirium                                                                                                                                  |
| F13.5 | Mental and behavioural disorders due to use of sedatives or hypnotics: Psychotic disorder                                                                                                                                              |
| F13.6 | Mental and behavioural disorders due to use of sedatives or hypnotics: Amnesic syndrome                                                                                                                                                |
| F13.7 | Mental and behavioural disorders due to use of sedatives or hypnotics: Residual and late-onset psychiatric disorder                                                                                                                    |
| F13.8 | Mental and behavioural disorders due to use of sedatives or hypnotics: Other mental and behavioural disorders                                                                                                                          |
| F13.9 | Mental and behavioural disorders due to use of sedatives or hypnotics: Unspecified mental and behavioural disorder                                                                                                                     |
| F15.0 | Mental and behavioural disorders due to use of other stimulants, including caffeine: Acute intoxication                                                                                                                                |
| F15.1 | Mental and behavioural disorders due to use of other stimulants, including caffeine: Harmful use                                                                                                                                       |
| F15.2 | Mental and behavioural disorders due to use of other stimulants, including caffeine: Dependence syndrome                                                                                                                               |

|       |                                                                                                                                                 |
|-------|-------------------------------------------------------------------------------------------------------------------------------------------------|
| F15.3 | Mental and behavioural disorders due to use of other stimulants, including caffeine: Withdrawal state                                           |
| F15.4 | Mental and behavioural disorders due to use of other stimulants, including caffeine: Withdrawal state with delirium                             |
| F15.5 | Mental and behavioural disorders due to use of other stimulants, including caffeine: Psychotic disorder                                         |
| F15.6 | Mental and behavioural disorders due to use of other stimulants, including caffeine: Amnesic syndrome                                           |
| F15.7 | Mental and behavioural disorders due to use of other stimulants, including caffeine: Residual and late-onset psychotic disorder                 |
| F15.8 | Mental and behavioural disorders due to use of other stimulants, including caffeine: Other mental and behavioural disorders                     |
| F15.9 | Mental and behavioural disorders due to use of other stimulants, including caffeine: Unspecified mental and behavioural disorder                |
| F19.0 | Mental and behavioural disorders due to multiple drug use and use of other psychoactive substances: Acute intoxication                          |
| F19.1 | Mental and behavioural disorders due to multiple drug use and use of other psychoactive substances: Harmful use                                 |
| F19.2 | Mental and behavioural disorders due to multiple drug use and use of other psychoactive substances: Dependence syndrome                         |
| F19.3 | Mental and behavioural disorders due to multiple drug use and use of other psychoactive substances: Withdrawal state                            |
| F19.4 | Mental and behavioural disorders due to multiple drug use and use of other psychoactive substances: Withdrawal state with delirium              |
| F19.5 | Mental and behavioural disorders due to multiple drug use and use of other psychoactive substances: Psychotic disorder                          |
| F19.6 | Mental and behavioural disorders due to multiple drug use and use of other psychoactive substances: Amnesic syndrome                            |
| F19.7 | Mental and behavioural disorders due to multiple drug use and use of other psychoactive substances: Residual and late-onset psychotic disorder  |
| F19.8 | Mental and behavioural disorders due to multiple drug use and use of other psychoactive substances: Other mental and behavioural disorders      |
| F19.9 | Mental and behavioural disorders due to multiple drug use and use of other psychoactive substances: Unspecified mental and behavioural disorder |
| G21.2 | Secondary parkinsonism due to other external agents                                                                                             |
| I42.7 | Cardiomyopathy due to drugs and other external agents                                                                                           |
| L23.3 | Allergic contact dermatitis due to drugs in contact with skin                                                                                   |
| L24.4 | Irritant contact dermatitis due to drugs in contact with skin                                                                                   |
| L25.1 | Unspecified contact dermatitis due to drugs in contact with skin                                                                                |
| L27   | Dermatitis due to substances taken internally                                                                                                   |
| L27.0 | Generalized skin eruption due to drugs and medicaments                                                                                          |
| L27.1 | Localized skin eruption due to drugs and medicaments                                                                                            |
| L27.8 | Dermatitis due to other substances taken internally                                                                                             |
| L27.9 | Dermatitis due to unspecified substance taken internally                                                                                        |
| M34.2 | Systemic sclerosis induced by drugs and chemicals                                                                                               |
| N14.1 | Nephropathy induced by other drugs, medicaments and biological substances                                                                       |
| N14.2 | Nephropathy induced by unspecified drug, medicament or biological substance                                                                     |
| N14.3 | Nephropathy induced by heavy metals                                                                                                             |
| N14.4 | Toxic nephropathy, not elsewhere classified                                                                                                     |
| O35.5 | Maternal care for (suspected) damage to fetus by drugs                                                                                          |
| P04.4 | Fetus and newborn affected by maternal use of drugs of addiction                                                                                |
| P58.4 | Neonatal jaundice due to drugs or toxins transmitted from mother or given to newborn                                                            |
| P93   | Reactions and intoxications due to drugs administered to fetus and newborn                                                                      |

|         |                                                                                                                                                                                                                                                       |
|---------|-------------------------------------------------------------------------------------------------------------------------------------------------------------------------------------------------------------------------------------------------------|
| P96.1   | Neonatal withdrawal symptoms from maternal use of drugs of addiction                                                                                                                                                                                  |
| T78     | Adverse effects, not elsewhere classified                                                                                                                                                                                                             |
| T78.2   | Anaphylactic shock, unspecified                                                                                                                                                                                                                       |
| T78.3   | Angioneurotic oedema                                                                                                                                                                                                                                  |
| T78.4   | Allergy, unspecified                                                                                                                                                                                                                                  |
| T78.8   | Other adverse effects, not elsewhere classified                                                                                                                                                                                                       |
| T78.9   | Adverse effect, unspecified                                                                                                                                                                                                                           |
| T80.1   | Vascular complications following infusion, transfusion and therapeutic injection                                                                                                                                                                      |
| T80.2   | Infections following infusion, transfusion and therapeutic injection                                                                                                                                                                                  |
| T80.3   | ABO incompatibility reaction                                                                                                                                                                                                                          |
| T80.4   | Rh incompatibility reaction                                                                                                                                                                                                                           |
| T80.5   | Complications following infusion, transfusion and therapeutic injection: anaphylactic shock due to serum                                                                                                                                              |
| T80.6   | Complications following infusion, transfusion and therapeutic injection: other serum reactions                                                                                                                                                        |
| T80.8   | Other complications following infusion, transfusion and therapeutic injection                                                                                                                                                                         |
| T80.9   | Unspecified complication following infusion, transfusion and therapeutic injection                                                                                                                                                                    |
| T88.6   | Anaphylactic shock due to adverse effect of correct drug or medicament properly administered                                                                                                                                                          |
| T88.7   | Unspecified adverse event of drug or medicament                                                                                                                                                                                                       |
| Y57.9   | Drugs, medicaments and biological substances causing adverse effects in therapeutic use -Other and unspecified drugs and medicaments, Drug or medicament, unspecified                                                                                 |
| Y59.9   | Vaccine or biological substance, unspecified                                                                                                                                                                                                          |
| Z03.6   | Observation for suspected toxic effect from ingested substance                                                                                                                                                                                        |
|         | Poisoning by drugs, medicaments and biological substances: “premature, excessive, inappropriate or wrong medication, formulation or route” <sup>9</sup> -- overdose of these substances (accidental or not) - wrong substance given or taken in error |
| T36-T50 |                                                                                                                                                                                                                                                       |
| T36     | Poisoning by systemic antibiotics                                                                                                                                                                                                                     |
| T36.0   | Penicillins                                                                                                                                                                                                                                           |
| T36.1   | Cefalosporins and other beta-lactam antibiotics                                                                                                                                                                                                       |
| T36.2   | Chloramphenicol group                                                                                                                                                                                                                                 |
| T36.3   | Macrolides                                                                                                                                                                                                                                            |
| T36.4   | Tetracyclines                                                                                                                                                                                                                                         |
| T36.5   | Aminoglycosides                                                                                                                                                                                                                                       |
| T36.6   | Rifamycins                                                                                                                                                                                                                                            |
| T36.7   | Antifungal antibiotics, systemically used                                                                                                                                                                                                             |
| T36.8   | Other systemic antibiotics                                                                                                                                                                                                                            |
| T36.9   | Systemic antibiotic, unspecified                                                                                                                                                                                                                      |
| T37     | Poisoning by other systemic anti-infectives and anti-parasitics                                                                                                                                                                                       |
| T37.0   | Sulfonamides                                                                                                                                                                                                                                          |
| T37.1   | Antimycobacterial drugs                                                                                                                                                                                                                               |
| T37.2   | Antimalarials and drugs acting on other blood protozoa                                                                                                                                                                                                |
| T37.3   | Other antiprotozoal drugs                                                                                                                                                                                                                             |
| T37.4   | Anthelmintics                                                                                                                                                                                                                                         |
| T37.5   | Antiviral drugs                                                                                                                                                                                                                                       |
| T37.8   | Other specified systemic anti-infectives and antiparasitics                                                                                                                                                                                           |
| T37.9   | Systemic anti-infective and antiparasitic, unspecified                                                                                                                                                                                                |
| T38     | Poisoning by hormones and their synthetic substitutes and antagonists, not elsewhere classified                                                                                                                                                       |
| T38.0   | Glucocorticoids and synthetic analogues                                                                                                                                                                                                               |
| T38.1   | Thyroid hormones and substitutes                                                                                                                                                                                                                      |
| T38.2   | Antithyroid drugs                                                                                                                                                                                                                                     |
| T38.3   | Insulin and oral hypoglycaemic [antidiabetic] drugs                                                                                                                                                                                                   |



|       |                                                                                            |
|-------|--------------------------------------------------------------------------------------------|
| T38.4 | Oral contraceptives                                                                        |
| T38.5 | Other estrogens and progestogens                                                           |
| T38.6 | Antigonadotrophins, antiestrogens, antiandrogens, not elsewhere classified                 |
| T38.7 | Androgens and anabolic congeners                                                           |
| T38.8 | Other and unspecified hormones and their synthetic substitutes                             |
| T38.9 | Other and unspecified hormone antagonists                                                  |
| T39   | Poisoning by nonopioid analgesics, antipyretics and antirheumatics                         |
| T39.0 | Salicylates                                                                                |
| T39.1 | 4-Aminophenol derivatives                                                                  |
| T39.2 | Pyrazolone derivatives                                                                     |
| T39.3 | Other nonsteroidal anti-inflammatory drugs [NSAID]                                         |
| T39.4 | Antirheumatics, not elsewhere classified                                                   |
| T39.8 | Other nonopioid analgesics and antipyretics, not elsewhere classified                      |
| T39.9 | Nonopioid analgesic, antipyretic and antirheumatic, unspecified                            |
| T40   | Poisoning by narcotics and psychodysleptics                                                |
| T40.0 | Opium                                                                                      |
| T40.1 | Heroin                                                                                     |
| T40.2 | Poisoning by other opioids (includes morphine and codeine)                                 |
| T40.3 | Poisoning by Methadone                                                                     |
| T40.4 | Poisoning by other synthetic narcotics (buprenorphine, pethidine, destropropoxyphene etc.) |
| T40.5 | Cocaine                                                                                    |
| T40.6 | Poisoning by other and unspecified narcotics                                               |
| T40.7 | Cannabis (derivatives)                                                                     |
| T40.8 | Lysergide [LSD]                                                                            |
| T40.9 | Other and unspecified psychodysleptics [hallucinogens]                                     |
| T41   | Poisoning by anaesthetics and therapeutic gases                                            |
| T41.0 | Inhaled anaesthetics                                                                       |
| T41.1 | Intravenous anaesthetics                                                                   |
| T41.2 | Other and unspecified general anaesthetics                                                 |
| T41.3 | Local anaesthetics                                                                         |
| T41.4 | Anaesthetic, unspecified                                                                   |
| T41.5 | Therapeutic gases                                                                          |
| T42   | Poisoning by antiepileptic, sedative-hypnotic and antiparkinsonism drugs                   |
| T42.0 | Hydantoin derivatives                                                                      |
| T42.1 | Iminostilbenes                                                                             |
| T42.2 | Succinimides and oxazolidinediones                                                         |
| T42.3 | Barbiturates                                                                               |
| T42.4 | Poisoning by benzodiazepines                                                               |
| T42.5 | Mixed antiepileptics, not elsewhere classified                                             |
| T42.6 | Other antiepileptic and sedative-hypnotic drugs                                            |
| T42.7 | Antiepileptic and sedative-hypnotic drugs, unspecified                                     |
| T42.8 | Antiparkinsonism drugs and other central muscle-tone depressants                           |
| T43   | Poisoning by psychotropic drugs, not elsewhere classified                                  |
| T43.0 | Poisoning by tricyclic and tetracyclic antidepressants                                     |
| T43.1 | Monoamine-oxidase-inhibitor antidepressants                                                |
| T43.2 | Poisoning by other and unspecified antidepressants                                         |
| T43.3 | Phenothiazine antipsychotics and neuroleptics                                              |
| T43.4 | Butyrophenone and thioxanthene neuroleptics                                                |
| T43.5 | Other and unspecified antipsychotics and neuroleptics                                      |

|       |                                                                                                            |
|-------|------------------------------------------------------------------------------------------------------------|
| T43.6 | Poisoning by psychostimulants with abuse potential                                                         |
| T43.8 | Other psychotropic drugs, not elsewhere classified                                                         |
| T43.9 | Psychotropic drug, unspecified                                                                             |
| T44   | Poisoning by drugs primarily affecting the autonomic nervous system                                        |
| T44.0 | Anticholinesterase agents                                                                                  |
| T44.1 | Other parasympathomimetics [cholinergics]                                                                  |
| T44.2 | Ganglionic blocking drugs, not elsewhere classified                                                        |
| T44.3 | Other parasympatholytics [anticholinergics and antimuscarinics] and spasmolytics, not elsewhere classified |
| T44.4 | Predominantly alpha-adrenoreceptor agonists, not elsewhere classified                                      |
| T44.5 | Predominantly beta-adrenoreceptor agonists, not elsewhere classified                                       |
| T44.6 | Alpha-adrenoreceptor antagonists, not elsewhere classified                                                 |
| T44.7 | Beta-adrenoreceptor antagonists, not elsewhere classified                                                  |
| T44.8 | Centrally acting and adrenergic-neuron-blocking agents, not elsewhere classified                           |
| T44.9 | Other and unspecified drugs primarily affecting the autonomic nervous system                               |
| T45   | Poisoning by primarily systemic and haematological agents, not elsewhere classified                        |
| T45.0 | Antiallergic and antiemetic drugs                                                                          |
| T45.1 | Antineoplastic and immunosuppressive drugs                                                                 |
| T45.2 | Vitamins, not elsewhere classified                                                                         |
| T45.3 | Enzymes, not elsewhere classified                                                                          |
| T45.4 | Iron and its compounds                                                                                     |
| T45.5 | Anticoagulants                                                                                             |
| T45.6 | Fibrinolysis-affecting drugs                                                                               |
| T45.7 | Anticoagulant antagonists, vitamin K and other coagulants                                                  |
| T45.8 | Other primarily systemic and haematological agents                                                         |
| T45.9 | Primarily systemic and haematological agent, unspecified                                                   |
| T46   | Poisoning by agents primarily affecting the cardiovascular system                                          |
| T46.0 | Cardiac-stimulant glycosides and drugs of similar action                                                   |
| T46.1 | Calcium-channel blockers                                                                                   |
| T46.2 | Other antidysrhythmic drugs, not elsewhere classified                                                      |
| T46.3 | Coronary vasodilators, not elsewhere classified                                                            |
| T46.4 | Angiotensin-converting-enzyme inhibitors                                                                   |
| T46.5 | Other antihypertensive drugs, not elsewhere classified                                                     |
| T46.6 | Antihyperlipidaemic and antiarteriosclerotic drugs                                                         |
| T46.7 | Peripheral vasodilators                                                                                    |
| T46.8 | Antivaricose drugs, including sclerosing agents                                                            |
| T46.9 | Other and unspecified agents primarily affecting the cardiovascular system                                 |
| T47   | Poisoning by agents primarily affecting the gastrointestinal system                                        |
| T47.0 | Histamine H <sub>2</sub> -receptor antagonists                                                             |
| T47.1 | Other antacids and anti-gastric-secretion drugs                                                            |
| T47.2 | Stimulant laxatives                                                                                        |
| T47.3 | Saline and osmotic laxatives                                                                               |
| T47.4 | Other laxatives                                                                                            |
| T47.5 | Digestants                                                                                                 |
| T47.6 | Antidiarrhoeal drugs                                                                                       |
| T47.7 | Emetics                                                                                                    |
| T47.8 | Other agents primarily affecting the gastrointestinal system                                               |
| T47.9 | Agent primarily affecting the gastrointestinal system, unspecified                                         |
| T48   | Poisoning by agents primarily acting on smooth and skeletal muscles and the respiratory system             |
| T48.0 | Oxytocic drugs                                                                                             |

|       |                                                                                                                                                                                                                                                                                   |
|-------|-----------------------------------------------------------------------------------------------------------------------------------------------------------------------------------------------------------------------------------------------------------------------------------|
| T48.1 | Skeletal muscle relaxants [neuromuscular blocking agents]                                                                                                                                                                                                                         |
| T48.2 | Other and unspecified agents primarily acting on muscles                                                                                                                                                                                                                          |
| T48.3 | Antitussives                                                                                                                                                                                                                                                                      |
| T48.4 | Expectorants                                                                                                                                                                                                                                                                      |
| T48.5 | Anti-common-cold drugs                                                                                                                                                                                                                                                            |
| T48.6 | Antiasthmatics, not elsewhere classified                                                                                                                                                                                                                                          |
| T48.7 | Other and unspecified agents primarily acting on the respiratory system                                                                                                                                                                                                           |
| T49.0 | Local antifungal, anti-infective and anti-inflammatory drugs, not elsewhere classified                                                                                                                                                                                            |
| T49   | Poisoning by topical agents primarily affecting skin and mucous membrane and by ophthalmological, otorhinolaryngological and dental drugs                                                                                                                                         |
| T49.1 | Antipruritics                                                                                                                                                                                                                                                                     |
| T49.2 | Local astringents and local detergents                                                                                                                                                                                                                                            |
| T49.3 | Emollients, demulcents and protectants                                                                                                                                                                                                                                            |
| T49.4 | Keratolytics, keratoplastics and other hair treatment drugs and preparations                                                                                                                                                                                                      |
| T49.5 | Ophthalmological drugs and preparations                                                                                                                                                                                                                                           |
| T49.6 | Otorhinolaryngological drugs and preparations                                                                                                                                                                                                                                     |
| T49.7 | Dental drugs, topically applied                                                                                                                                                                                                                                                   |
| T49.8 | Other topical agents                                                                                                                                                                                                                                                              |
| T49.9 | Topical agent, unspecified                                                                                                                                                                                                                                                        |
| T50   | Poisoning by diuretics and other unspecified drugs, medicaments and biological substances                                                                                                                                                                                         |
| T50.0 | Mineralocorticoids and their antagonists                                                                                                                                                                                                                                          |
| T50.1 | Loop [high-ceiling] diuretics                                                                                                                                                                                                                                                     |
| T50.2 | Carbonic-anhydrase inhibitors, benzothiadiazides and other diuretics                                                                                                                                                                                                              |
| T50.4 | Drugs affecting uric acid metabolism                                                                                                                                                                                                                                              |
| T50.6 | Antidotes and chelating agents, not elsewhere classified                                                                                                                                                                                                                          |
| T50.7 | Analeptics and opioid receptor antagonists                                                                                                                                                                                                                                        |
| F55   | Abuse of non-dependence-producing substances                                                                                                                                                                                                                                      |
| T50.3 | Electrolytic, caloric and water-balance agents                                                                                                                                                                                                                                    |
| T50.5 | Appetite depressants                                                                                                                                                                                                                                                              |
| T50.8 | Diagnostic agents                                                                                                                                                                                                                                                                 |
| T50.9 | Poisoning: Other and unspecified drugs, medicaments and biological substances                                                                                                                                                                                                     |
| T96   | Sequelae of poisoning by drugs, medicaments and biological substances                                                                                                                                                                                                             |
| X40   | Accidental poisoning by and exposure to nonopioid analgesics, antipyretics, and antirheumatics including acetaminophen                                                                                                                                                            |
| X41   | Accidental poisoning by and exposure to antiepileptic, sedative hypnotic, antiparkinsonism, psychotropic drugs NEC                                                                                                                                                                |
| X42   | Accidental poisoning by and exposure to narcotics and psychodysleptics (hallucinogens) NEC (includes diamorphine (heroin), cocaine, codeine, lysergide (LSD), morphine, pethidine, narcotic NEC, hallucinogen NEC, hydrocodone, oxycodone (oxycontin) and fentanyl, among others) |
| X43   | Accidental poisoning by and exposure to other drugs acting on the autonomic nervous system                                                                                                                                                                                        |
| X44   | Accidental poisoning by and exposure to other and unspecified drugs, medicaments, and biological substances                                                                                                                                                                       |
| X45.5 | Adverse effects of therapeutic use of 4-aminophenol derivatives                                                                                                                                                                                                                   |
| Y10   | Poisoning by and exposure to nonopioid analgesics, antipyretics and antirheumatics, undetermined intent                                                                                                                                                                           |
| A04.7 | Enterocolitis due to <i>Clostridium difficile</i>                                                                                                                                                                                                                                 |
| E15   | Nondiabetic hypoglycaemic coma                                                                                                                                                                                                                                                    |
| H91.0 | Ototoxic hearing loss                                                                                                                                                                                                                                                             |
| K52.1 | Toxic gastroenteritis and colitis                                                                                                                                                                                                                                                 |
| K71.0 | Toxic liver disease with cholestasis                                                                                                                                                                                                                                              |
| K71.1 | Toxic liver disease with hepatic necrosis                                                                                                                                                                                                                                         |

|       |                                                                                |
|-------|--------------------------------------------------------------------------------|
| K71.2 | Toxic liver disease with acute hepatitis                                       |
| K71.3 | Toxic liver disease with chronic persistent hepatitis                          |
| K71.4 | Toxic liver disease with chronic lobular hepatitis                             |
| K71.5 | Toxic liver disease with chronic active hepatitis                              |
| K71.6 | Toxic liver disease with hepatitis, not elsewhere classified                   |
| K71.7 | Toxic liver disease with fibrosis and cirrhosis of liver                       |
| K71.8 | Toxic liver disease with other disorders of liver                              |
| K71.9 | Toxic liver disease, unspecified                                               |
| L51   | Erythema multiforme                                                            |
| L51.0 | Nonbullous erythema multiforme                                                 |
| L51.1 | Bullous erythema multiforme                                                    |
| L51.2 | Toxic epidermal necrolysis [Lyell]                                             |
| L51.8 | Other erythema multiforme                                                      |
| L51.9 | Erythema multiforme, unspecified                                               |
| L56.2 | Photocontact dermatitis [berloque dermatitis]                                  |
| N99.0 | Postprocedural renal failure                                                   |
| O74.2 | Cardiac complications of anaesthesia during labour and delivery                |
| O74.3 | Central nervous system complications of anaesthesia during labour and delivery |
| Y63   | Failure in dosage during surgical and medical care                             |
| Y65.1 | Wrong fluid in infusion                                                        |
| Y69   | Unspecified misadventure during surgical and medical care                      |
| D62   | Acute posthaemorrhagic anaemia                                                 |
| D69.5 | Secondary thrombocytopenia                                                     |
| D69.6 | Thrombocytopenia, unspecified                                                  |
| D70   | Agranulocytosis                                                                |
| F52   | Sexual dysfunction, not caused by organic disorder or disease                  |
| F52.0 | Lack or loss of sexual desire                                                  |
| F52.1 | Sexual aversion and lack of sexual enjoyment                                   |
| F52.2 | Failure of genital response                                                    |
| F52.3 | Orgasmic dysfunction                                                           |
| F52.4 | Premature ejaculation                                                          |
| F52.5 | Nonorganic vaginismus                                                          |
| F52.6 | Nonorganic dyspareunia                                                         |
| F52.7 | Excessive sexual drive                                                         |
| F52.8 | Other sexual dysfunction, not caused by organic disorder or disease            |
| F52.9 | Unspecified sexual dysfunction, not caused by organic disorder or disease      |
| H53   | Visual disturbances                                                            |
| H53.0 | Amblyopia ex anopsia                                                           |
| H53.1 | Subjective visual disturbances                                                 |
| H53.2 | Diplopia                                                                       |
| H53.3 | Other disorders of binocular vision                                            |
| H53.4 | Visual field defects                                                           |
| H53.5 | Colour vision deficiencies                                                     |
| H53.6 | Night blindness                                                                |
| H53.8 | Other visual disturbances                                                      |
| H53.9 | Visual disturbance, unspecified                                                |
| I15.8 | Other secondary hypertension                                                   |
| I15.9 | Secondary hypertension, unspecified                                            |
| J45.1 | Nonallergic asthma                                                             |

|       |                                                                                                     |
|-------|-----------------------------------------------------------------------------------------------------|
| K25.0 | Gastric ulcer: Acute with haemorrhage                                                               |
| K25.1 | Gastric ulcer: Acute with perforation                                                               |
| K25.2 | Gastric ulcer: Acute with both haemorrhage and perforation                                          |
| K25.3 | Gastric ulcer: Acute without haemorrhage or perforation                                             |
| K25.4 | Gastric ulcer: Chronic or unspecified with haemorrhage                                              |
| K25.5 | Gastric ulcer: Chronic or unspecified with perforation                                              |
| K25.6 | Gastric ulcer: Chronic or unspecified with both haemorrhage and perforation                         |
| K25.7 | Gastric ulcer: Chronic without haemorrhage or perforation                                           |
| K25.9 | Gastric ulcer: Unspecified as acute or chronic, without haemorrhage or perforation                  |
| K26.0 | Duodenal ulcer: Acute with haemorrhage                                                              |
| K26.1 | Duodenal ulcer: Acute with perforation                                                              |
| K26.2 | Duodenal ulcer: Acute with both haemorrhage and perforation                                         |
| K26.3 | Duodenal ulcer: Acute without haemorrhage or perforation                                            |
| K26.4 | Duodenal ulcer: Chronic or unspecified with haemorrhage                                             |
| K26.5 | Duodenal ulcer: Chronic or unspecified with perforation                                             |
| K26.6 | Duodenal ulcer: Chronic or unspecified with both haemorrhage and perforation                        |
| K26.7 | Duodenal ulcer: Chronic without haemorrhage or perforation                                          |
| K26.9 | Duodenal ulcer: Unspecified as acute or chronic, without haemorrhage or perforation                 |
| K27.0 | Peptic ulcer, site unspecified: Acute with haemorrhage                                              |
| K27.1 | Peptic ulcer, site unspecified: Acute with perforation                                              |
| K27.2 | Peptic ulcer, site unspecified: Acute with both haemorrhage and perforation                         |
| K27.3 | Peptic ulcer, site unspecified: Acute without haemorrhage or perforation                            |
| K27.4 | Peptic ulcer, site unspecified: Chronic or unspecified with haemorrhage                             |
| K27.5 | Peptic ulcer, site unspecified: Chronic or unspecified with perforation                             |
| K27.6 | Peptic ulcer, site unspecified: Chronic or unspecified with both haemorrhage and perforation        |
| K27.7 | Peptic ulcer, site unspecified: Chronic without haemorrhage or perforation                          |
| K27.9 | Peptic ulcer, site unspecified: Unspecified as acute or chronic, without haemorrhage or perforation |
| K28   | Gastrojejunal ulcer                                                                                 |
| K28.0 | Gastrojejunal ulcer: Acute with haemorrhage                                                         |
| K28.1 | Gastrojejunal ulcer: Acute with perforation                                                         |
| K28.2 | Gastrojejunal ulcer: Acute with both haemorrhage and perforation                                    |
| K28.3 | Gastrojejunal ulcer: Acute without haemorrhage or perforation                                       |
| K28.4 | Gastrojejunal ulcer: Chronic or unspecified with haemorrhage                                        |
| K28.5 | Gastrojejunal ulcer: Chronic or unspecified with perforation                                        |
| K28.6 | Gastrojejunal ulcer: Chronic or unspecified with both haemorrhage and perforation                   |
| K28.7 | Gastrojejunal ulcer: Chronic without haemorrhage or perforation                                     |
| K28.9 | Gastrojejunal ulcer: Unspecified as acute or chronic, without haemorrhage or perforation            |
| K29.0 | Acute haemorrhagic gastritis                                                                        |
| K52.9 | Non-infective gastroenteritis and colitis, unspecified                                              |
| L29.0 | Pruritus ani                                                                                        |
| L29.1 | Pruritus scroti                                                                                     |
| L29.2 | Pruritus vulvae                                                                                     |
| L29.3 | Anogenital pruritus, unspecified                                                                    |
| L29.8 | Other pruritus                                                                                      |
| L29.9 | Pruritus, unspecified                                                                               |
| L50.0 | Allergic urticaria                                                                                  |
| N17   | Acute renal failure                                                                                 |
| N17.0 | Acute renal failure with tubular necrosis                                                           |
| N17.1 | Acute renal failure with acute cortical necrosis                                                    |

|       |                                                                                                    |
|-------|----------------------------------------------------------------------------------------------------|
| N17.2 | Acute renal failure with medullary necrosis                                                        |
| N17.8 | Other acute renal failure                                                                          |
| N17.9 | Acute renal failure, unspecified                                                                   |
| N18   | Chronic kidney disease                                                                             |
| N18.0 | End-stage renal disease                                                                            |
| N18.9 | Chronic renal failure, unspecified                                                                 |
| N19   | Unspecified renal failure                                                                          |
| O26.6 | Liver disorders in pregnancy, childbirth and the puerperium                                        |
| O74.6 | Other complications of spinal and epidural anaesthesia during labour and delivery                  |
| T88.5 | Other complications of anaesthesia                                                                 |
| Y66   | Non administration of surgical and medical care                                                    |
| D50.0 | Cod                                                                                                |
| D61.9 | Aplastic Anemia, unspecified                                                                       |
| D65   | Disseminated intravascular coagulation (defibrination syndrome)                                    |
| D68.4 | Acquired coagulation factor deficiency                                                             |
| D68.9 | Coagulation defect, unspecified                                                                    |
| D69   | Purpura and other haemorrhagic conditions                                                          |
| D69.9 | Hemorrhagic condition, unspecified                                                                 |
| E86   | Volume depletion                                                                                   |
| E87   | Hyperosmolality and hypernatremia                                                                  |
| E87.0 | Hyperosmolality and hypernatraemia                                                                 |
| E87.1 | Hypo-osmolality and hyponatraemia                                                                  |
| E87.2 | Acidosis                                                                                           |
| E87.3 | Alkalosis                                                                                          |
| E87.4 | Mixed disorder of acid-base balance                                                                |
| E87.5 | Hyperkalaemia                                                                                      |
| E87.6 | Hypokalaemia                                                                                       |
| E87.7 | Fluid overload                                                                                     |
| E87.8 | Other disorders of electrolyte and fluid balance, not elsewhere classified                         |
| F05   | Delirium, not induced by alcohol and other psychoactive substances                                 |
| F15   | Mental and behavioural disorders due to use of other stimulants, including caffeine                |
| F16   | Mental and behavioural disorders due to use of hallucinogens                                       |
| F19   | Mental and behavioural disorders due to multiple drug use and use of other psychoactive substances |
| G04.0 | Acute disseminated encephalitis                                                                    |
| G25.3 | Myoclonus                                                                                          |
| G40.5 | Special epileptic syndromes                                                                        |
| G71.1 | Myotonic disorders                                                                                 |
| G95.8 | Other specified diseases of spinal cord                                                            |
| H11.3 | Conjunctival hemorrhage                                                                            |
| H21.0 | Hyphaema                                                                                           |
| H31.3 | Choroidal hemorrhage and rupture                                                                   |
| H35.6 | Retinal hemorrhage                                                                                 |
| H43.1 | Vitreous hemorrhage                                                                                |
| H92.2 | Otorrhagia                                                                                         |
| I26.0 | Pulmonary embolism with mention of acute cor pulmonale                                             |
| I26.9 | Pulmonary embolism without mention of acute cor pulmonale                                          |
| I31.2 | Haemopericardium, not elsewhere classified                                                         |
| I44   | Atrioventricular and left bundle-branch block                                                      |
| I44.0 | Atrioventricular block, first degree                                                               |

|       |                                                                            |
|-------|----------------------------------------------------------------------------|
| I44.1 | Atrioventricular block, second degree                                      |
| I44.2 | Atrioventricular block, complete                                           |
| I44.3 | Other and unspecified atrioventricular block                               |
| I44.4 | Left anterior fascicular block                                             |
| I44.5 | Left posterior fascicular block                                            |
| I44.6 | Other and unspecified fascicular block                                     |
| I44.7 | Left bundle-branch block, unspecified                                      |
| I45.8 | Other specified conduction disorders                                       |
| I46.1 | Sudden cardiac death, so described                                         |
| I47.2 | Ventricular tachycardia                                                    |
| I60   | Subarachnoid hemorrhage                                                    |
| I61   | Intracerebral hemorrhage                                                   |
| I61.0 | Intracerebral haemorrhage in hemisphere, subcortical                       |
| I61.1 | Intracerebral haemorrhage in hemisphere, cortical                          |
| I61.2 | Intracerebral haemorrhage in hemisphere, unspecified                       |
| I61.3 | Intracerebral haemorrhage in brain stem                                    |
| I61.4 | Intracerebral haemorrhage in cerebellum                                    |
| I61.5 | Intracerebral haemorrhage, intraventricular                                |
| I61.6 | Intracerebral haemorrhage, multiple localized                              |
| I61.8 | Other intracerebral haemorrhage                                            |
| I61.9 | Intracerebral haemorrhage, unspecified                                     |
| I62   | Other nontraumatic intracranial hemorrhage                                 |
| I80   | Phlebitis and thrombophlebitis                                             |
| I80.0 | Phlebitis and thrombophlebitis of superficial vessels of lower extremities |
| I80.1 | Phlebitis and thrombophlebitis of femoral vein                             |
| I80.2 | Phlebitis and thrombophlebitis of other deep vessels of lower extremities  |
| I80.3 | Phlebitis and thrombophlebitis of lower extremities, unspecified           |
| I80.8 | Phlebitis and thrombophlebitis of other sites                              |
| I80.9 | Phlebitis and thrombophlebitis of unspecified site                         |
| I95   | Hypotension                                                                |
| J38.5 | Laryngeal spasm                                                            |
| J45.0 | Predominantly allergic asthma                                              |
| J45.8 | Mixed asthma                                                               |
| J81   | Pulmonary oedema                                                           |
| K25   | Gastric ulcer                                                              |
| K26   | Duodenal ulcer                                                             |
| K27   | Peptic ulcer, site unspecified                                             |
| K62.5 | Hemorrhage of anus and rectum                                              |
| K66.1 | Hemoperitoneum                                                             |
| K71   | Toxic liver disease                                                        |
| K72.0 | Acute and subacute hepatic failure                                         |
| K72.9 | Hepatic failure, unspecified                                               |
| K76.7 | Hepatorenal syndrome                                                       |
| K92.0 | Hematemesis                                                                |
| K92.1 | Melena                                                                     |
| K92.2 | Gastrointestinal haemorrhage, unspecified                                  |
| L21   | Seborrhoeic dermatitis                                                     |
| L21.0 | Seborrhoea capitis                                                         |
| L21.1 | Seborrhoeic infantile dermatitis                                           |



|       |                                                                                                                       |
|-------|-----------------------------------------------------------------------------------------------------------------------|
| L26   | Exfoliative dermatitis                                                                                                |
| L28   | Lichen simplex chronicus and prurigo                                                                                  |
| L30   | Other dermatitis                                                                                                      |
| L52   | Erythema nodosum                                                                                                      |
| L71.0 | Perioral dermatitis                                                                                                   |
| M25.0 | Hemarthrosis                                                                                                          |
| M31.0 | Hypersensitivity angiitis                                                                                             |
| M62.8 | Other specified disorders of muscle                                                                                   |
| N42.1 | Congestion and hemorrhage of prostate                                                                                 |
| N62   | Hypertrophy of breast                                                                                                 |
| N83.6 | Hemosalpinx                                                                                                           |
| N83.7 | Hematoma of broad ligament                                                                                            |
| N85.7 | Hematometra                                                                                                           |
| N89.7 | Hematocolpos                                                                                                          |
| N95.3 | States associated with artificial menopause                                                                           |
| R00.1 | Bradycardia, unspecified                                                                                              |
| R04.0 | Epistaxis                                                                                                             |
| R04.1 | Hemorrhage from throat                                                                                                |
| R04.8 | Hemorrhage from other sites in respiratory passage                                                                    |
| R04.9 | Hemorrhage from respiratory passage, unspecified                                                                      |
| R06.0 | Dyspnoea                                                                                                              |
| R11   | Nausea and vomiting                                                                                                   |
| R17   | Unspecified jaundice                                                                                                  |
| R20   | Disturbances of skin sensation                                                                                        |
| R21   | Rash and other nonspecific skin eruption                                                                              |
| R23   | Other skin changes                                                                                                    |
| R23.3 | Spontaneous ecchymoses                                                                                                |
| R31   | Unspecified hematuria                                                                                                 |
| R34   | Anuria and oliguria                                                                                                   |
| R41.0 | Disorientation, unspecified                                                                                           |
| R42   | Dizziness and giddiness                                                                                               |
| R44.0 | Auditory hallucinations                                                                                               |
| R44.1 | Visual hallucinations                                                                                                 |
| R44.2 | Other hallucinations                                                                                                  |
| R44.3 | Hallucinations, unspecified                                                                                           |
| R51   | Headache                                                                                                              |
| R55   | Syncope and collapse                                                                                                  |
| R58   | Haemorrhage, not elsewhere classified                                                                                 |
| R73.9 | Hyperglycaemia, unspecified                                                                                           |
| R74.0 | Elevation of levels of transaminase and lactic acid dehydrogenase [LDH]                                               |
| S06.4 | Epidural hemorrhage                                                                                                   |
| T88.2 | Shock due to anaesthesia                                                                                              |
| T88.8 | Other specified complications of surgical and medical care, not elsewhere classified                                  |
| T88.9 | Complication of surgical and medical care, unspecified                                                                |
| Y12   | Poisoning by and exposure to narcotics and psychodysleptics (hallucinogens) NEC, undetermined intent                  |
| Y14   | Poisoning by and exposure to other and unspecified drugs, medicaments, and biological substances, undetermined intent |
| D68.8 | Other specified coagulation defects                                                                                   |
| G25.0 | Essential tremor                                                                                                      |



|       |                                                                                                   |
|-------|---------------------------------------------------------------------------------------------------|
| I49.0 | Ventricular fibrillation and flutter                                                              |
| I85.0 | Esophageal varices with bleeding                                                                  |
| J46   | Status asthmaticus                                                                                |
| J80   | Adult respiratory distress syndrome                                                               |
| K52.8 | Other specified noninfective gastroenteritis and colitis                                          |
| L20   | Atopic dermatitis                                                                                 |
| L29   | Pruritis                                                                                          |
| N92.1 | Excessive and frequent menstruation with irregular cycle                                          |
| N92.2 | Excessive menstruation at puberty                                                                 |
| N92.3 | Ovulation bleeding                                                                                |
| N92.4 | Excessive bleeding in the premenopausal period                                                    |
| N92.6 | Irregular menstruation, unspecified                                                               |
| N93   | Other abnormal uterine and vaginal bleeding                                                       |
| N95.0 | Postmenopausal bleeding                                                                           |
| R44   | Other symptoms and signs involving general sensations and perceptions                             |
| S06.5 | Traumatic subdural hemorrhage                                                                     |
| S06.6 | Traumatic subarachnoid hemorrhage                                                                 |
| S06.8 | Other intracranial injuries                                                                       |
| T80.7 | Unspecified adverse drug effect                                                                   |
| T81   | Complications of procedures, not elsewhere classified                                             |
| Y60.1 | Unintentional cut, puncture, perforation or haemorrhage during during infusion or transfusion     |
| Y60.2 | Unintentional cut, puncture, perforation or haemorrhage during kidney dialysis or other perfusion |
| Y60.3 | Unintentional cut, puncture, perforation or haemorrhage during injection or immunization          |
| Y62.1 | Failure of sterile precautions during infusion or transfusion                                     |
| Y62.2 | Failure of sterile precautions during kidney dialysis or other perfusion                          |
| Y62.3 | Failure of sterile precautions during injection or immunization                                   |
| Y64   | Contaminated medical or biological substances                                                     |
| Y65.0 | Mismatched blood used in transfusion                                                              |
| Z88   | Personal history of allergy to drugs, medicaments, and biological substances                      |
| A80.0 | Acute paralytic poliomyelitis, vaccine-associated                                                 |
| M02.2 | Postimmunization arthropathy                                                                      |
| T88.0 | Infection following immunization                                                                  |
| T88.1 | Infection complications following immunization                                                    |

**Table A4. Medication Class Distributions Overall and According to Cluster**

| Medication Classes                                                     | Overall<br>(n=188,354) |       | Cluster 1<br>(n=25,995) |               | Cluster 2<br>(n=47,737) |               | Cluster 3<br>(n=22,147) |               | Cluster 4<br>(n=28,924) |               | Cluster 5<br>(n=17,867) |               | Cluster 6<br>(n=45,684) |               |      |
|------------------------------------------------------------------------|------------------------|-------|-------------------------|---------------|-------------------------|---------------|-------------------------|---------------|-------------------------|---------------|-------------------------|---------------|-------------------------|---------------|------|
|                                                                        | N                      | % pts | N                       | % pts cluster | N                       | % pts cluster | N                       | % pts cluster | N                       | % pts cluster | N                       | % pts cluster | N                       | % pts cluster |      |
| A02 Drugs for Acid Related Disorders                                   | 45,252                 | 24.0  | 4,010                   | 15.4          | 9,780                   | 20.5          | 11,446                  | 51.7          | 18,266                  | 63.2          | 40,4                    | 119           | 0.7                     | 1,631         | 3.6  |
| A03 Drugs for Functional Gastrointestinal Disorders                    | 3,869                  | 2.1   | 1                       | (-)           | 813                     | 1.7           | 1,498                   | 6.8           | 1,338                   | 4.6           | 34.6                    | 8             | (-)                     | 211           | 0.5  |
| A06 Drugs for Constipation                                             | 31,048                 | 16.5  | 937                     | 3.6           | 2,704                   | 5.7           | 7,442                   | 33.6          | 7,657                   | 26.5          | 24.7                    | 934           | 5.2                     | 11,374        | 24.9 |
| A07 Antidiarrheals, Intestinal Anti-inflammatory/Anti-infective Agents | 2,995                  | 1.6   | 9                       | (-)           | 1,240                   | 2.6           | 907                     | 4.1           | 650                     | 2.3           | 21.7                    | 101           | 0.6                     | 88            | 0.2  |
| A10 Drugs Used in Diabetes                                             | 23,337                 | 12.4  | 2,950                   | 11.4          | 4,350                   | 9.1           | 2,756                   | 12.4          | 12,342                  | 42.7          | 52.9                    | 383           | 2.1                     | 556           | 1.2  |
| B01 Antithrombotic Agents                                              | 56,203                 | 29.8  | 14,449                  | 55.6          | 1,790                   | 3.7           | 4,193                   | 18.9          | 14,342                  | 49.6          | 25.5                    | 418           | 2.3                     | 21,051        | 46.1 |
| B03 Antanemic Preparations                                             | 2,788                  | 1.5   | 98                      | 0.4           | 578                     | 1.2           | 1,055                   | 4.8           | 983                     | 3.4           | 35.3                    | 0             | (-)                     | 74            | 0.2  |
| C01 Cardiac Therapy                                                    | 18,874                 | 10.0  | 7,771                   | 29.9          | 1,959                   | 4.1           | 1,071                   | 4.8           | 7,928                   | 27.4          | 42.0                    | 9             | 0.1                     | 136           | 0.3  |
| C02 Antihypertensives                                                  | 2,893                  | 1.5   | 405                     | 1.6           | 507                     | 1.1           | 118                     | 0.5           | 1,853                   | 6.4           | 64.1                    | 0             | (-)                     | 10            | (-)  |
| C03 Diuretics                                                          | 36,355                 | 19.3  | 7,759                   | 29.9          | 7,238                   | 15.2          | 4,503                   | 20.3          | 16,506                  | 57.1          | 45.4                    | 25            | 0.1                     | 324           | 0.7  |
| C07 Beta Blocking Agents                                               | 41,797                 | 22.2  | 13,487                  | 51.9          | 4,648                   | 9.7           | 3,732                   | 16.9          | 19,209                  | 66.4          | 46.0                    | 22            | 0.1                     | 699           | 1.5  |
| C08 Calcium Channel Blockers                                           | 29,850                 | 15.9  | 4,673                   | 18.0          | 6,885                   | 14.2          | 5,503                   | 24.9          | 11,999                  | 41.5          | 40.2                    | 47            | 0.3                     | 743           | 1.6  |
| C09 Agents Acting on the Renin-Angiotensin System                      | 40,975                 | 21.8  | 11,089                  | 42.7          | 5,700                   | 11.9          | 6,195                   | 28.0          | 16,968                  | 58.7          | 41.4                    | 55            | 0.3                     | 968           | 2.1  |
| C10 Lipid Modifying Agents                                             | 47,317                 | 25.1  | 14,154                  | 54.5          | 2,992                   | 6.3           | 6,909                   | 31.2          | 22,308                  | 77.1          | 47.2                    | 31            | 0.2                     | 923           | 2.0  |
| D01 Antifungals for Dermatological Use                                 | 3,425                  | 1.8   | 43                      | 0.2           | 697                     | 1.5           | 1,471                   | 6.6           | 1,078                   | 3.7           | 31.5                    | 54            | 0.3                     | 82            | 0.2  |
| D07 Corticosteroids, Dermatological Preparations                       | 2,234                  | 1.2   | 74                      | 0.3           | 683                     | 1.4           | 662                     | 3.0           | 637                     | 2.2           | 28.5                    | 52            | 0.3                     | 126           | 0.3  |
| G04 Urologicals                                                        | 16,102                 | 8.6   | 936                     | 3.6           | 3,410                   | 7.1           | 3,388                   | 15.3          | 6,789                   | 23.5          | 42.2                    | 790           | 4.4                     | 789           | 1.7  |
| H02 Corticosteroids for Systemic Use                                   | 13,729                 | 7.3   | 12                      | 0.1           | 7,283                   | 15.3          | 2,302                   | 10.4          | 2,393                   | 8.3           | 17.4                    | 1,708         | 9.6                     | 31            | 0.1  |
| H03 Thyroid Therapy                                                    | 17,747                 | 9.4   | 1,066                   | 4.1           | 2,985                   | 6.3           | 5,813                   | 26.3          | 7,187                   | 24.9          | 40.5                    | 18            | 0.1                     | 678           | 1.5  |

|                                                         |        |      |       |      |     |        |      |      |        |      |      |         |      |      |        |      |      |        |      |      |
|---------------------------------------------------------|--------|------|-------|------|-----|--------|------|------|--------|------|------|---------|------|------|--------|------|------|--------|------|------|
| <b>J01</b> Antibacterials for Systemic Use              | 43,107 | 22.9 | 1,256 | 4.8  | 2.9 | 10,030 | 21.0 | 23.3 | 5,720  | 25.8 | 13.3 | 6,377   | 22.1 | 14.8 | 17,867 | 100  | 41.5 | 1,857  | 4.1  | 4.3  |
| <b>J05</b> Antivirals for Systemic Use                  | 1,808  | 1.0  | 21    | 0.1  | 1.2 | 795    | 1.7  | 44.0 | 525    | 2.4  | 28.9 | 351     | 1.2  | 19.4 | 106    | 0.6  | 5.9  | 12     | (-)  | 0.7  |
| <b>M01</b> Anti-inflammatory and Antirheumatic Products | 5,580  | 3.0  | 65    | 0.3  | 1.2 | 500    | 1.1  | 9.0  | 1,632  | 7.4  | 29.3 | 594     | 2.1  | 10.7 | 98     | 0.6  | 1.8  | 2,691  | 5.9  | 48.2 |
| <b>M04</b> Antigout Preparations                        | 5,057  | 2.7  | 337   | 1.3  | 6.7 | 819    | 1.7  | 16.2 | 539    | 2.4  | 10.7 | 3,288   | 11.4 | 65.0 | 2      | (-)  | (-)  | 72     | 0.2  | 1.4  |
| <b>M05</b> Drugs for Treatment of Bone Diseases         | 7,867  | 4.2  | 325   | 1.3  | 4.1 | 1,307  | 2.7  | 16.6 | 3,336  | 15.1 | 42.4 | 2,592   | 9.0  | 33.0 | 7      | (-)  | 0.1  | 300    | 0.7  | 3.8  |
| <b>N02</b> Analgesics                                   | 75,579 | 40.1 | 3,471 | 13.4 | 4.6 | 5,668  | 11.9 | 7.5  | 13,248 | 59.8 | 17.5 | 11,021  | 38.1 | 14.6 | 3,388  | 19.0 | 4.5  | 38,783 | 84.9 | 51.3 |
| <b>N03</b> Antiepileptics                               | 17,386 | 9.2  | 163   | 0.6  | 0.9 | 2,417  | 5.1  | 13.9 | 6,640  | 30.0 | 38.2 | 5,580   | 19.3 | 32.1 | 12     | 0.1  | 0.1  | 2,574  | 5.6  | 14.8 |
| <b>N04</b> Anti-Parkinson Drugs                         | 3,887  | 2.1  | 65    | 0.3  | 1.7 | 623    | 1.3  | 16.0 | 2,136  | 9.6  | 55.0 | 985     | 3.4  | 25.4 | 0      | (-)  | (-)  | 77     | 0.2  | 2.0  |
| <b>N05</b> Psycholeptics                                | 18,879 | 10.0 | 332   | 1.3  | 1.8 | 3,649  | 7.6  | 19.3 | 9,274  | 41.9 | 49.1 | 4,416   | 15.3 | 23.4 | 27     | 0.2  | 0.1  | 1,181  | 2.6  | 6.3  |
| <b>N06</b> Psychoanalptics                              | 32,555 | 17.3 | 596   | 2.3  | 1.8 | 4,137  | 8.7  | 12.7 | 15,534 | 70.1 | 47.7 | 11,4433 | 39.6 | 35.2 | 24     | 0.1  | 0.1  | 821    | 1.8  | 2.5  |
| <b>P01</b> Antiprotozoals                               | 4,513  | 2.4  | 40    | 0.2  | 0.9 | 1,336  | 2.8  | 29.6 | 521    | 2.4  | 11.5 | 535     | 1.9  | 11.9 | 1,949  | 10.9 | 43.2 | 132    | 0.3  | 2.9  |
| <b>R03</b> Drugs For Obstructive Airway Diseases        | 24,520 | 13.0 | 1,043 | 4.0  | 4.3 | 9,471  | 19.8 | 38.6 | 4,787  | 21.6 | 19.5 | 7,156   | 24.7 | 29.2 | 1,742  | 9.8  | 7.1  | 321    | 0.7  | 1.3  |
| <b>S01</b> Ophthalmologicals                            | 5,894  | 3.1  | 286   | 1.1  | 4.9 | 1,967  | 4.1  | 33.4 | 1,657  | 7.5  | 28.1 | 1,460   | 5.1  | 24.8 | 45     | 0.3  | 0.8  | 479    | 1.1  | 8.1  |

**Figure A1.** Difference in Prevalence of Medication Classes Dispensed in Each Cluster Compared to Study Population Prevalence

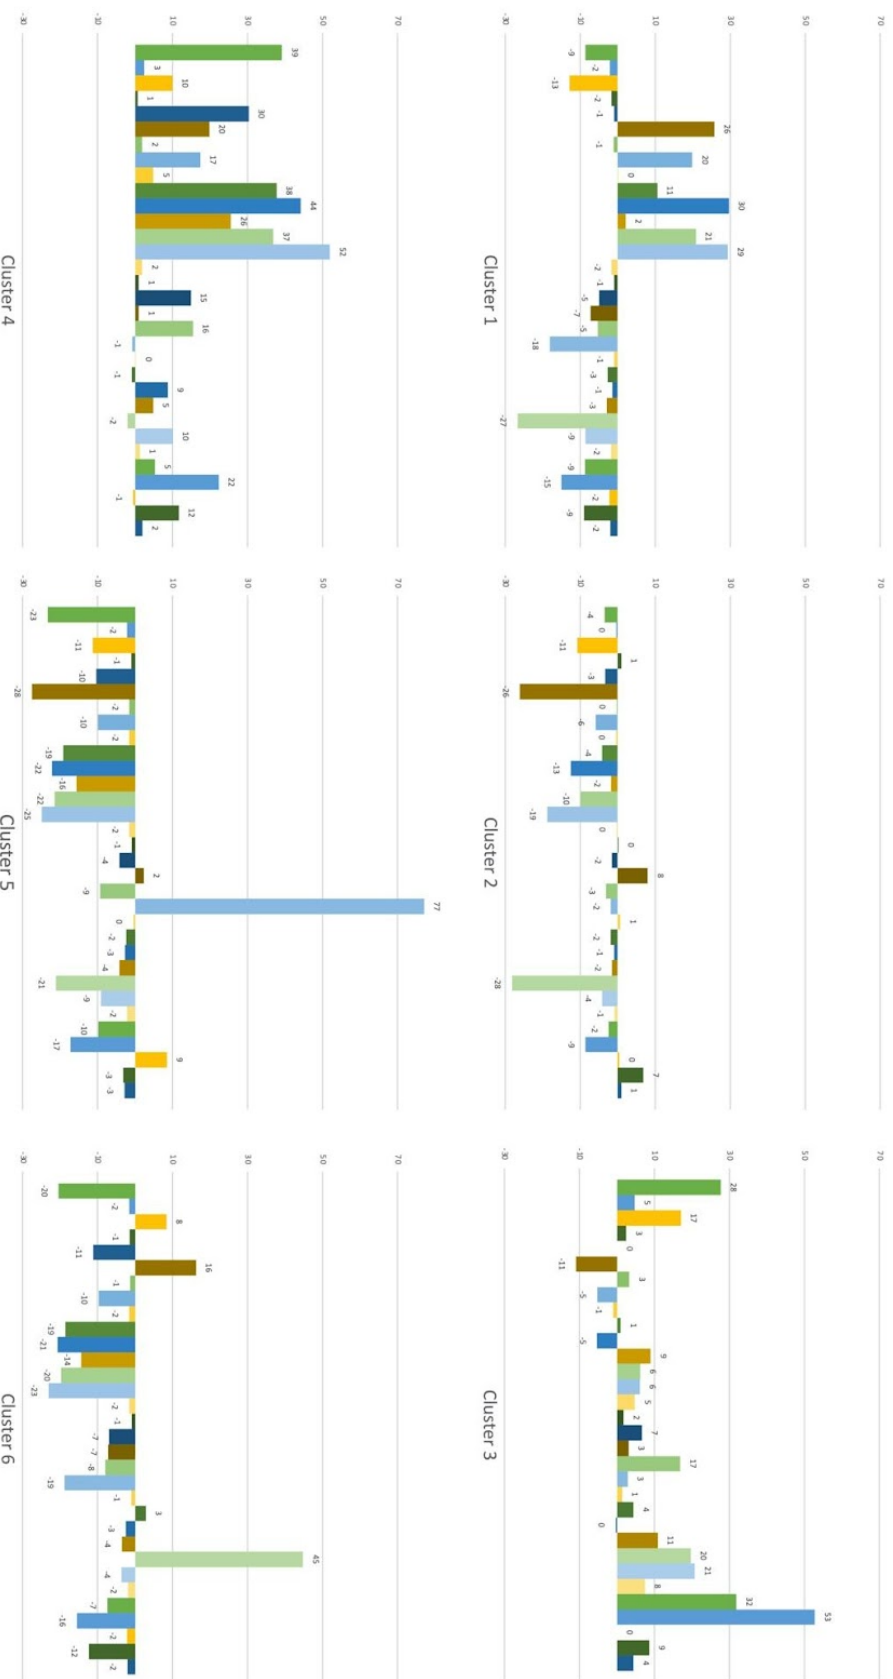

\*\* Y axis is difference in the proportion of patients dispensed each class within a given cluster compared to the population proportion

**Figure A2.** Prevalence of Cluster Membership within each Medication Class

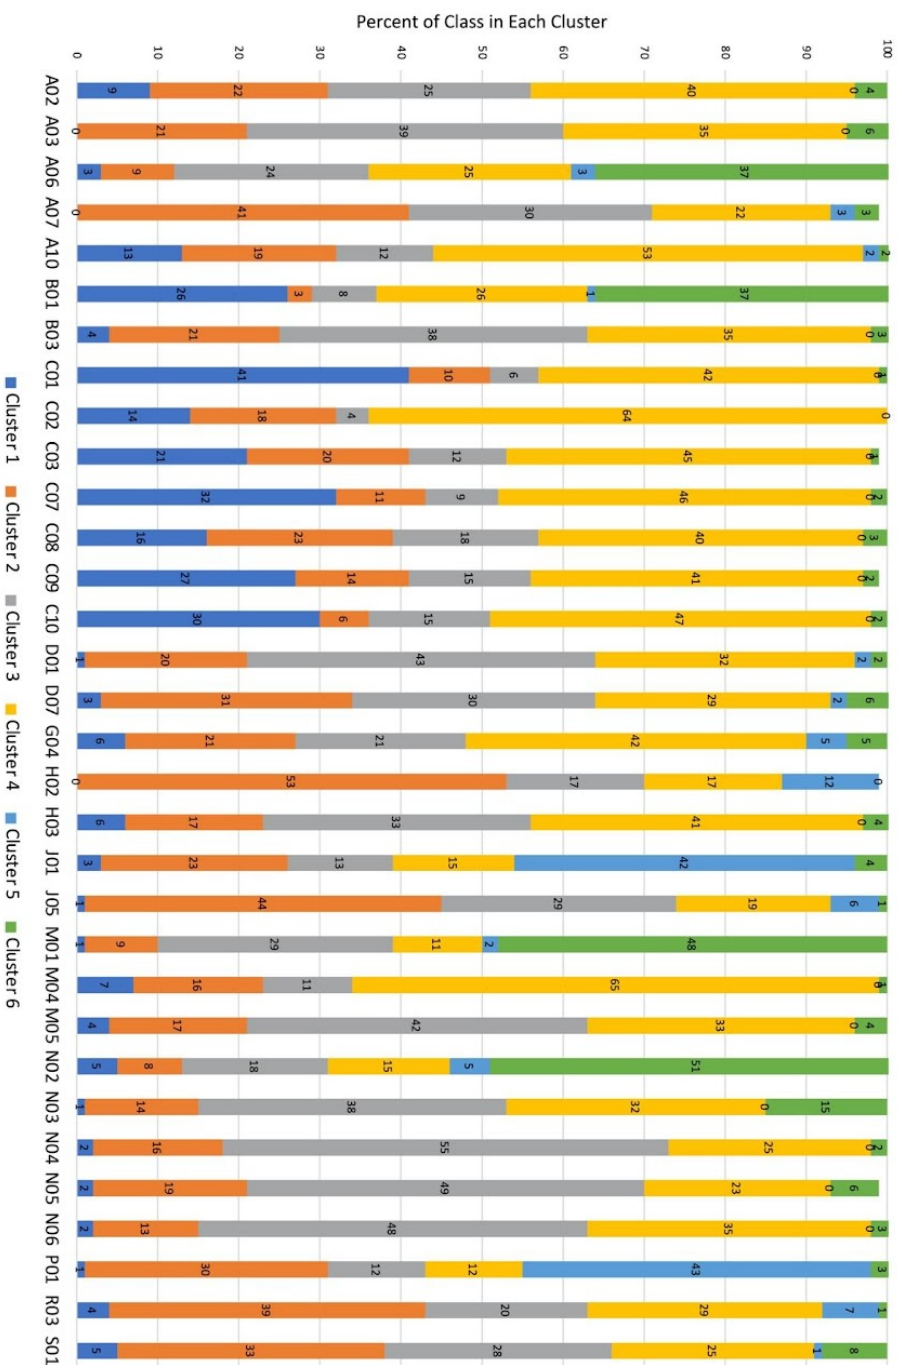

**Table A5.** Sensitivity analysis- Association Between Medication Clusters and Risk of ED visits and mortality in 30-days Following Discharge

| Medication Cluster           | Crude risk (%) | Adjusted OR* (95% CI) |
|------------------------------|----------------|-----------------------|
| Cardiovascular               | 24.2           | 0.89 (0.86-0.92)      |
| Respiratory                  | 29.5           | 1.07 (1.05-1.10)      |
| Complex care needs           | 25.3           | 0.80 (0.77-0.83)      |
| Cardiovascular and metabolic | 27.1           | 0.80 (0.77-0.82)      |
| Infection                    | 33.2           | 1.33 (1.28-1.38)      |
| Surgical                     | 24.0           | 1.21 (1.17-1.25)      |

\* Reference is all other clusters (e.g., cardiovascular vs not)

**Table A6.** Association between medication class and ED visits/mortality and ADEs in 30-days following discharge

| Medication Class                                                       | Adverse drug events in 30-days |                       |                |                       |                |                       | ED visits/mortality in 30-days |                       |                |                       |                |                       |
|------------------------------------------------------------------------|--------------------------------|-----------------------|----------------|-----------------------|----------------|-----------------------|--------------------------------|-----------------------|----------------|-----------------------|----------------|-----------------------|
|                                                                        | Overall                        |                       | Continued      |                       | New            |                       | Overall                        |                       | Continued      |                       | New            |                       |
|                                                                        | Crude risk (%)                 | Adjusted OR* (95% CI) | Crude risk (%) | Adjusted OR* (95% CI) | Crude risk (%) | Adjusted OR* (95% CI) | Crude risk (%)                 | Adjusted OR* (95% CI) | Crude risk (%) | Adjusted OR* (95% CI) | Crude risk (%) | Adjusted OR* (95% CI) |
| A02 Drugs for Acid Related Disorders                                   | 8.1                            | 1.02 (0.97-1.07)      | 7.9            | 0.96 (0.91-1.01)      | 8.5            | 1.17 (1.10-1.25)      | 28.2                           | 1.00 (0.97-1.03)      | 28.2           | 0.98 (0.95-1.01)      | 30.7           | 1.08 (1.04-1.13)      |
| A03 Drugs for Functional Gastrointestinal Disorders                    | 9.6                            | 1.12 (1.00-1.25)      | 8.8            | 1.06 (0.92-1.23)      | 10.9           | 1.27 (1.07-1.51)      | 35.4                           | 1.14 (1.06-1.27)      | 32.7           | 1.08 (0.98-1.18)      | 43.6           | 1.31 (1.16-1.47)      |
| A06 Drugs for Constipation                                             | 6.7                            | 1.01 (0.96-1.06)      | 7.6            | 0.91 (0.84-0.99)      | 6.3            | 1.06 (0.99-1.13)      | 27.3                           | 1.00 (0.97-1.03)      | 28.5           | 0.92 (0.87-0.96)      | 28.1           | 1.04 (1.01-1.08)      |
| A07 Antidiarrheals, Intestinal Anti-inflammatory/Anti-infective Agents | 10.0                           | 1.21 (1.07-1.37)      | 10.0           | 1.27 (1.05-1.54)      | 10.0           | 1.17 (1.00-1.38)      | 32.8                           | 1.01 (0.92-1.10)      | 31.4           | 0.96 (0.94-1.09)      | 36.4           | 1.05 (0.94-1.17)      |
| A10 Drugs Used in Diabetes                                             | 7.9                            | 0.92 (0.87-0.98)      | 7.4            | 0.88 (0.92-0.94)      | 9.5            | 1.10 (1.00-1.21)      | 26.4                           | 0.84 (0.81-0.87)      | 26.0           | 0.82 (0.80-0.87)      | 29.8           | 0.97 (0.91-1.03)      |
| B01 Antithrombotic Agents                                              | 6.5                            | 1.04 (0.99-1.09)      | 8.1            | 1.00 (0.94-1.06)      | 5.7            | 1.07 (1.01-1.13)      | 24.0                           | 1.02 (0.99-1.05)      | 26.9           | 0.95 (0.91-0.98)      | 23.3           | 1.07 (1.03-1.10)      |
| B03 Antianemic Preparations                                            | 8.7                            | 1.08 (0.94-1.23)      | 8.6            | 1.05 (0.90-1.24)      | 9.0            | 1.17 (0.92-1.50)      | 27.7                           | 0.95 (0.87-1.04)      | 27.6           | 0.94 (0.84-1.05)      | 30.1           | 1.02 (0.87-1.20)      |
| C01 Cardiac Therapy                                                    | 9.2                            | 1.07 (1.00-1.14)      | 8.7            | 0.94 (0.87-1.02)      | 9.5            | 1.16 (1.07-1.25)      | 29.3                           | 1.06 (1.02-1.10)      | 28.9           | 0.96 (0.91-1.02)      | 29.6           | 1.11 (1.06-1.16)      |
| C02 Antihypertensives                                                  | 12.7                           | 1.26 (1.12-1.42)      | 10.9           | 1.08 (0.92-1.27)      | 15.2           | 1.51 (1.28-1.78)      | 34.1                           | 1.11 (1.02-1.21)      | 32.4           | 0.95 (0.84-1.06)      | 39.8           | 1.35 (1.19-1.52)      |
| C03 Diuretics                                                          | 9.4                            | 1.11 (1.06-1.17)      | 9.2            | 1.05 (0.99-1.11)      | 9.7            | 1.20 (1.12-1.29)      | 28.4                           | 0.98 (0.95-1.01)      | 28.7           | 0.99 (0.96-1.03)      | 29.1           | 1.01 (0.97-1.06)      |
| C07 Beta Blocking Agents                                               | 8.5                            | 1.08 (1.03-1.13)      | 8.4            | 1.03 (0.98-1.09)      | 8.7            | 1.15 (1.07-1.23)      | 27.6                           | 1.02 (1.00-1.05)      | 27.2           | 0.95 (0.92-0.98)      | 29.2           | 1.14 (1.09-1.19)      |
| C08 Calcium Channel Blockers                                           | 7.8                            | 1.01 (0.96-1.06)      | 7.7            | 0.99 (0.92-1.04)      | 8.3            | 1.10 (1.01-1.19)      | 25.6                           | 0.92 (0.89-0.95)      | 25.6           | 0.90 (0.86-0.93)      | 27.5           | 1.01 (0.96-1.06)      |

|                                                          |      |                     |      |                     |      |                     |      |                     |      |                     |      |                     |
|----------------------------------------------------------|------|---------------------|------|---------------------|------|---------------------|------|---------------------|------|---------------------|------|---------------------|
| <b>C09</b> Agents Acting on the Renin-Angiotensin System | 6.9  | 0.91<br>(0.86-0.95) | 6.8  | 0.92<br>(0.87-0.97) | 7.0  | 0.93<br>(0.86-1.01) | 23.7 | 0.88<br>(0.85-0.91) | 23.9 | 0.89<br>(0.86-0.92) | 24.3 | 0.89<br>(0.86-0.94) |
| <b>C10</b> Lipid Modifying Agents                        | 7.2  | 0.90<br>(0.85-0.94) | 7.4  | 0.96<br>(0.91-1.01) | 6.6  | 0.89<br>(0.82-0.97) | 24.4 | 0.84<br>(0.82-0.87) | 24.9 | 0.88<br>(0.85-0.91) | 23.9 | 0.90<br>(0.86-0.95) |
| <b>D01</b> Antifungals for Dermatological Use            | 6.6  | 0.80<br>(0.70-0.92) | 6.2  | 0.72<br>(0.58-0.90) | 6.9  | 0.85<br>(0.71-1.01) | 22.8 | 0.82<br>(0.75-0.89) | 22.8 | 0.77<br>(0.68-0.88) | 25.6 | 0.82<br>(0.74-0.92) |
| <b>D07</b> Corticosteroids, Dermatological Preparations  | 6.6  | 0.85<br>(0.72-1.01) | 6.8  | 0.87<br>(0.70-1.06) | 6.3  | 0.84<br>(0.62-1.14) | 22.8 | 0.77<br>(0.70-0.85) | 22.6 | 0.75<br>(0.66-0.85) | 23.3 | 0.83<br>(0.70-0.99) |
| <b>G04</b> Urologicals                                   | 7.6  | 0.97<br>(0.91-1.04) | 7.6  | 0.97<br>(0.90-1.04) | 7.6  | 1.06<br>(0.93-1.19) | 30.4 | 1.11<br>(1.06-1.15) | 27.6 | 0.94<br>(0.90-1.00) | 40.1 | 1.66<br>(1.56-1.78) |
| <b>H02</b> Corticosteroids for Systemic Use              | 8.9  | 1.14<br>(1.07-1.23) | 8.9  | 1.07<br>(0.98-1.17) | 8.9  | 1.23<br>(1.12-1.35) | 35.2 | 1.17<br>(1.12-1.22) | 35.8 | 1.05<br>(0.99-1.11) | 36.7 | 1.27<br>(1.20-1.35) |
| <b>H03</b> Thyroid Therapy                               | 7.8  | 0.96<br>(0.90-1.02) | 7.8  | 0.98<br>(0.92-1.05) | 7.3  | 1.04<br>(0.82-1.33) | 25.8 | 0.93<br>(0.89-0.97) | 25.9 | 0.95<br>(0.91-1.00) | 26.9 | 0.89<br>(0.77-1.03) |
| <b>J01</b> Antibacterials for Systemic Use               | 6.8  | 0.95<br>(0.91-1.00) | 7.0  | 0.93<br>(0.84-1.02) | 6.7  | 0.97<br>(0.92-1.02) | 30.1 | 1.05<br>(1.02-1.08) | 33.9 | 1.06<br>(1.01-1.11) | 29.8 | 1.07<br>(1.04-1.10) |
| <b>J05</b> Antivirals for Systemic Use                   | 6.4  | 0.80<br>(0.66-0.97) | 6.1  | 0.70<br>(0.48-1.02) | 6.5  | 0.88<br>(0.70-1.02) | 26.4 | 0.80<br>(0.71-0.90) | 30.1 | 0.90<br>(0.73-1.11) | 27.3 | 0.78<br>(0.68-0.89) |
| <b>M01</b> Anti-inflammatory and Antirheumatic Products  | 4.3  | 0.84<br>(0.74-0.96) | 4.3  | 0.76<br>(0.62-0.93) | 4.3  | 0.90<br>(0.76-1.08) | 21.3 | 0.94<br>(0.88-1.01) | 21.9 | 0.85<br>(0.77-0.94) | 24.2 | 1.10<br>(0.92-1.10) |
| <b>M04</b> Antigout Preparations                         | 10.4 | 1.12<br>(1.02-1.24) | 10.3 | 1.14<br>(1.03-1.27) | 12.0 | 1.39<br>(1.05-1.83) | 31.6 | 1.04<br>(0.98-1.11) | 30.3 | 1.02<br>(0.95-1.09) | 45.9 | 1.63<br>(1.35-1.96) |
| <b>M05</b> Drugs for Treatment of Bone Diseases          | 6.6  | 0.92<br>(0.83-1.01) | 7.0  | 0.97<br>(0.88-1.07) | 4.2  | 0.70<br>(0.53-0.93) | 21.2 | 0.83<br>(0.79-0.88) | 22.4 | 0.88<br>(0.82-0.94) | 16.3 | 0.67 (0.57-0.79)    |
| <b>N02</b> Analgesics                                    | 5.6  | 0.90<br>(0.86-0.94) | 6.7  | 0.88<br>(0.83-0.93) | 5.1  | 0.95<br>(0.90-1.00) | 25.7 | 1.03<br>(1.00-1.06) | 29.4 | 0.94<br>(0.91-0.97) | 25.9 | 1.07<br>(1.04-1.10) |
| <b>N03</b> Antiepileptics                                | 7.8  | 1.09<br>(1.02-1.16) | 7.9  | 1.05<br>(0.97-1.13) | 7.6  | 1.25<br>(1.12-1.40) | 27.5 | 1.01<br>(0.97-1.05) | 28.4 | 0.97<br>(0.93-1.01) | 30.6 | 1.16<br>(1.09-1.25) |
| <b>N04</b> Anti-Parkinson Drugs                          | 6.7  | 0.91<br>(0.80-1.04) | 7.0  | 0.95<br>(0.83-1.09) | 4.4  | 0.62<br>(0.39-1.00) | 24.5 | 0.90<br>(0.83-0.97) | 25.5 | 0.95<br>(0.88-1.03) | 21.0 | 0.71<br>(0.55-0.92) |
| <b>N05</b> Psycholeptics                                 | 7.5  | 0.97<br>(0.91-1.03) | 7.4  | 0.98<br>(0.91-1.06) | 7.7  | 0.98<br>(0.89-1.08) | 28.6 | 1.01<br>(0.97-1.05) | 27.4 | 0.91<br>(0.87-0.95) | 34.6 | 1.23<br>(1.16-1.31) |
| <b>N06</b> Psychoanalptics                               | 7.3  | 0.90<br>(0.85-0.95) | 7.3  | 0.93<br>(0.88-0.99) | 7.1  | 0.92<br>(0.83-1.02) | 25.3 | 0.85<br>(0.82-0.88) | 26.1 | 0.88<br>(0.85-0.92) | 26.4 | 0.89<br>(0.84-0.95) |



|                                                        |     |                     |     |                     |     |                     |      |                     |      |                     |      |                      |
|--------------------------------------------------------|-----|---------------------|-----|---------------------|-----|---------------------|------|---------------------|------|---------------------|------|----------------------|
| <b>P01</b> Antiprotozoals                              | 8.3 | 1.22<br>(1.09-1.37) | 9.6 | 1.28<br>(1.00-1.63) | 8.0 | 1.21<br>(1.07-1.37) | 31.6 | 1.15<br>(1.07-1.23) | 33.6 | 1.14<br>(0.97-1.33) | 31.6 | 1.18<br>(1.10-1.28)  |
| <b>R03</b> Drugs For<br>Obstructive Airway<br>Diseases | 7.7 | 0.92<br>(0.86-0.97) | 7.4 | 0.86<br>(0.80-0.93) | 8.0 | 1.00<br>(0.93-1.08) | 27.5 | 0.88<br>(0.85-0.91) | 27.5 | 0.86<br>(0.83-0.90) | 28.1 | 0.93<br>(0.89 -0.97) |
| <b>S01</b> Ophthalmologicals                           | 5.7 | 0.72<br>(0.64-0.81) | 5.9 | 0.76<br>(0.67-0.86) | 4.9 | 0.59<br>(0.45-0.76) | 22.8 | 0.77<br>(0.72-0.82) | 20.6 | 0.69<br>(0.64-0.74) | 31.8 | 1.06<br>(0.93-1.20)  |
